# Supplementary material
Source: publisher figshare collection journal article supplement (https://acs.figshare.com/ndownloader/files/11499353)
Supplement: Supplementary file 1 [file 11499353]

## **Supplemental Information**

### **Greener Biogenic Approach for Synthesis of Palladium Nanoparticles using Papaya Peel: An Eco-friendly Catalyst for C-C Coupling Reaction**

Anindita Dewan\*, Manashi Sarmah, Ashim J. Thakur, Pankaj Bharali and Utpal Bora  
Advanced Organic synthesis and Catalysis Laboratory, Department of Chemical Sciences, Tezpur  
University, Napaam, Tezpur, Assam, Pin 784028

# Copies of $^1\text{H}$ NMR and $^{13}\text{C}$ NMR spectra of isolated products

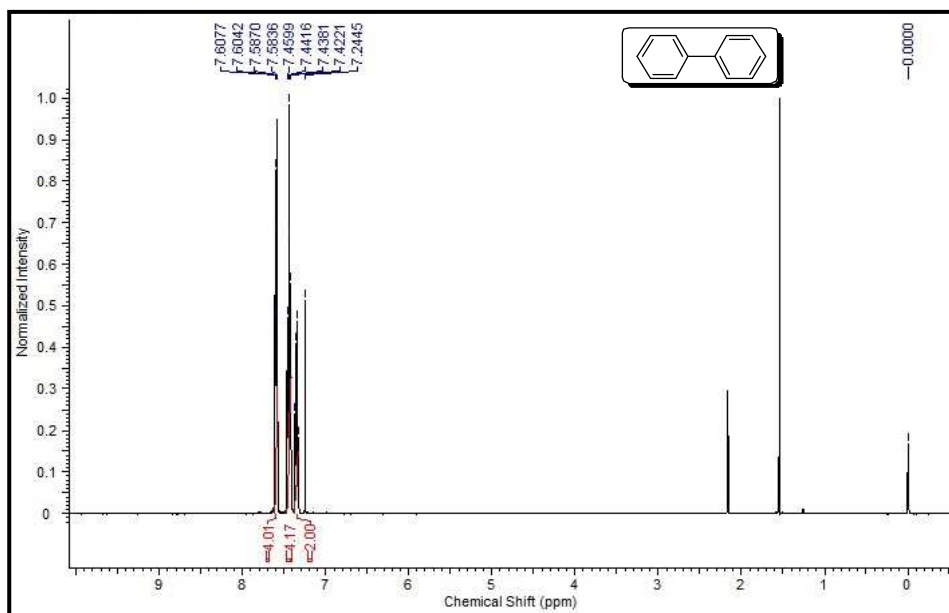

Figure S1

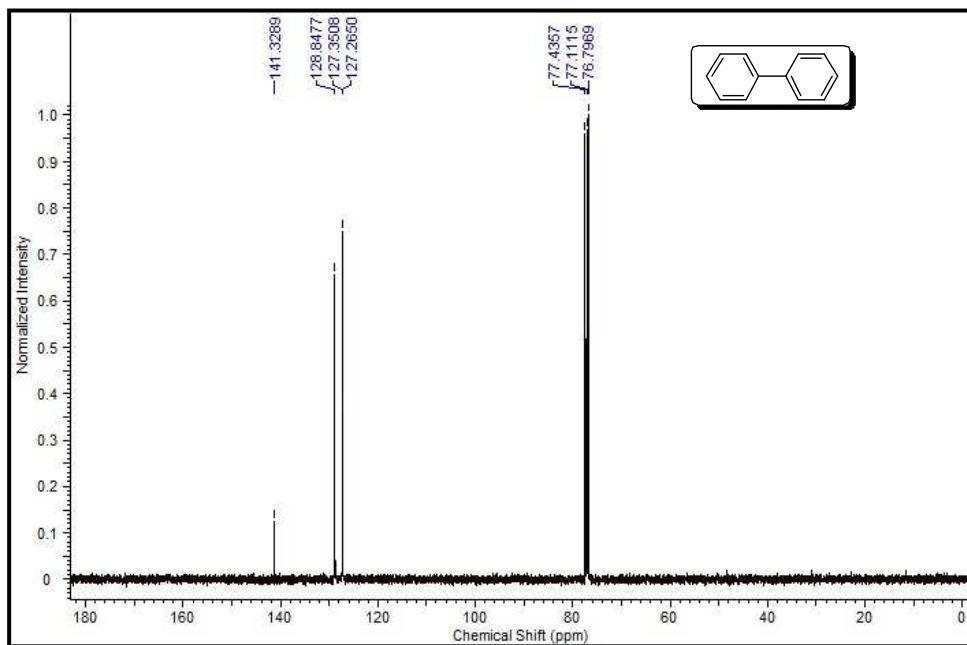

Figure S2

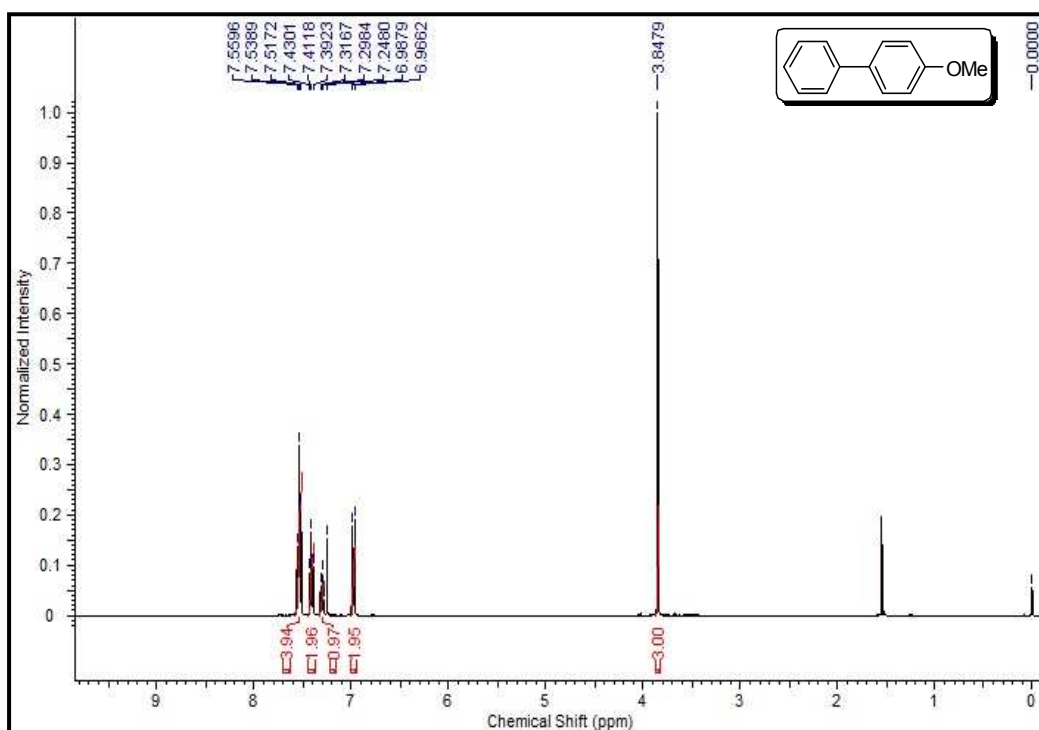

**Figure S3**

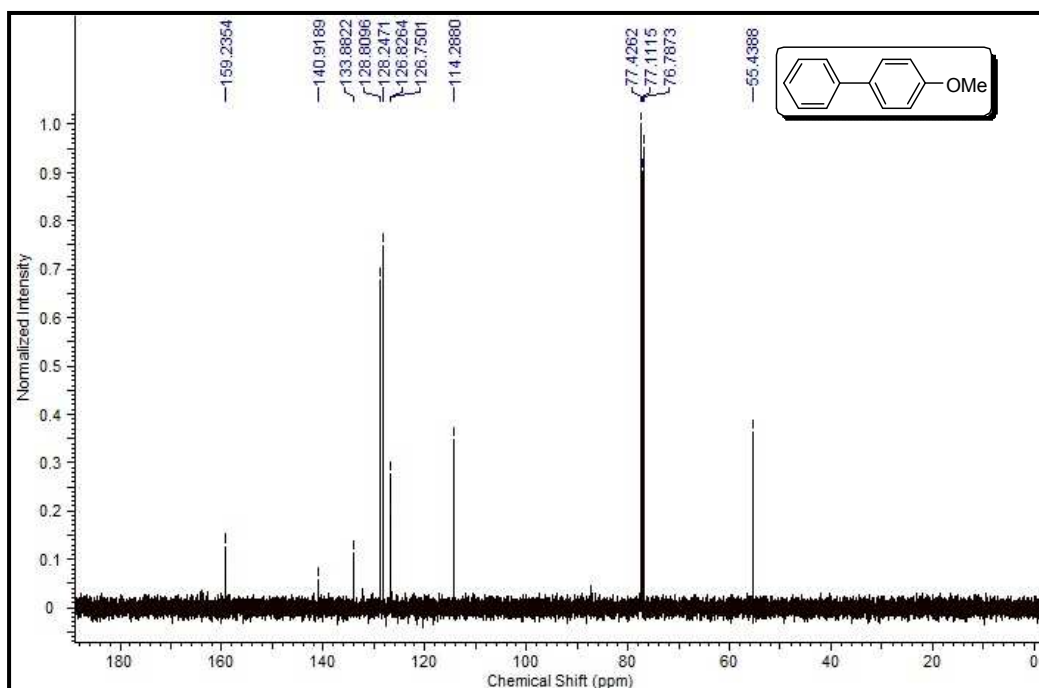

**Figure S4**

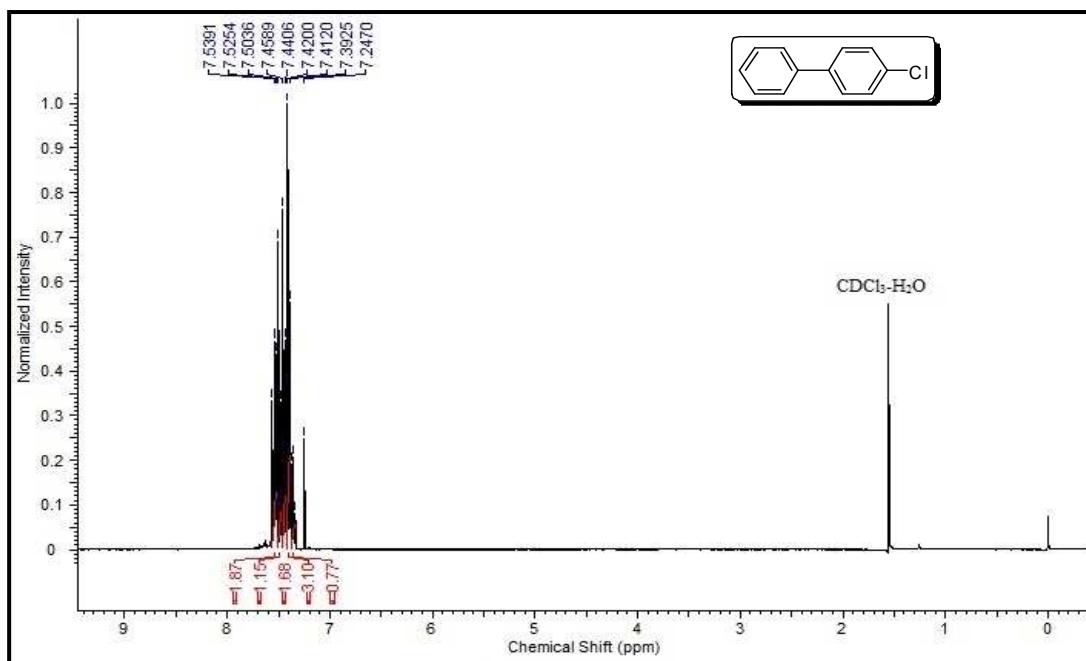

Figure S5

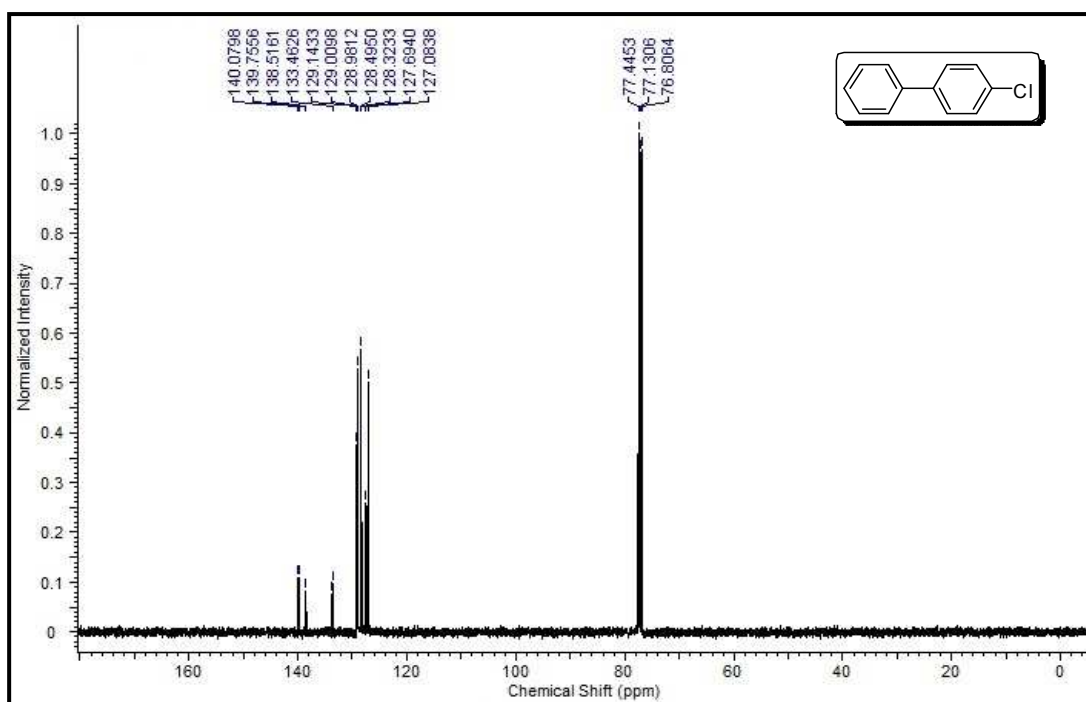

Figure S6

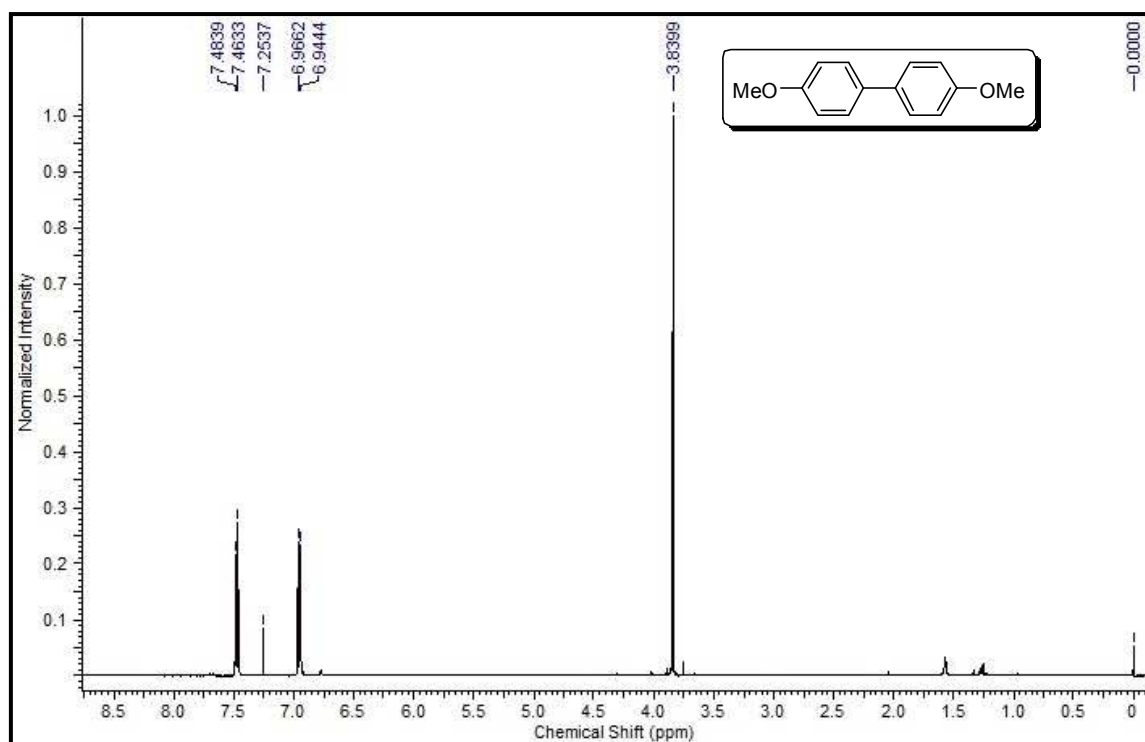

Figure S7

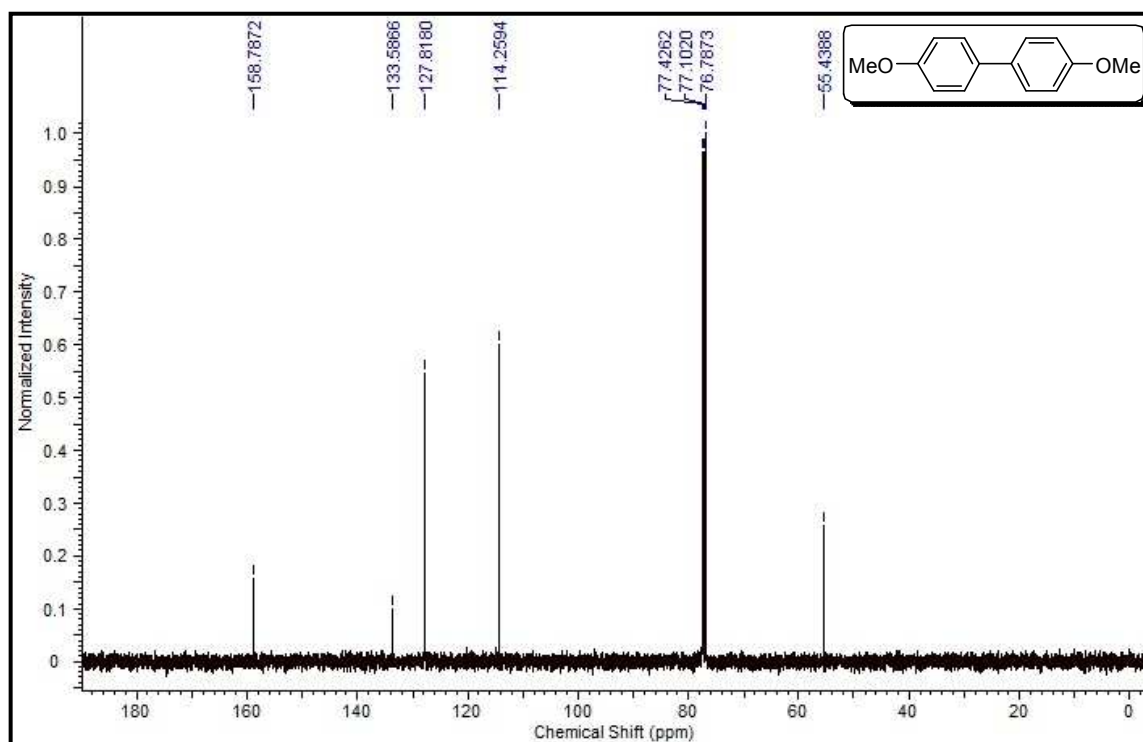

Figure S8

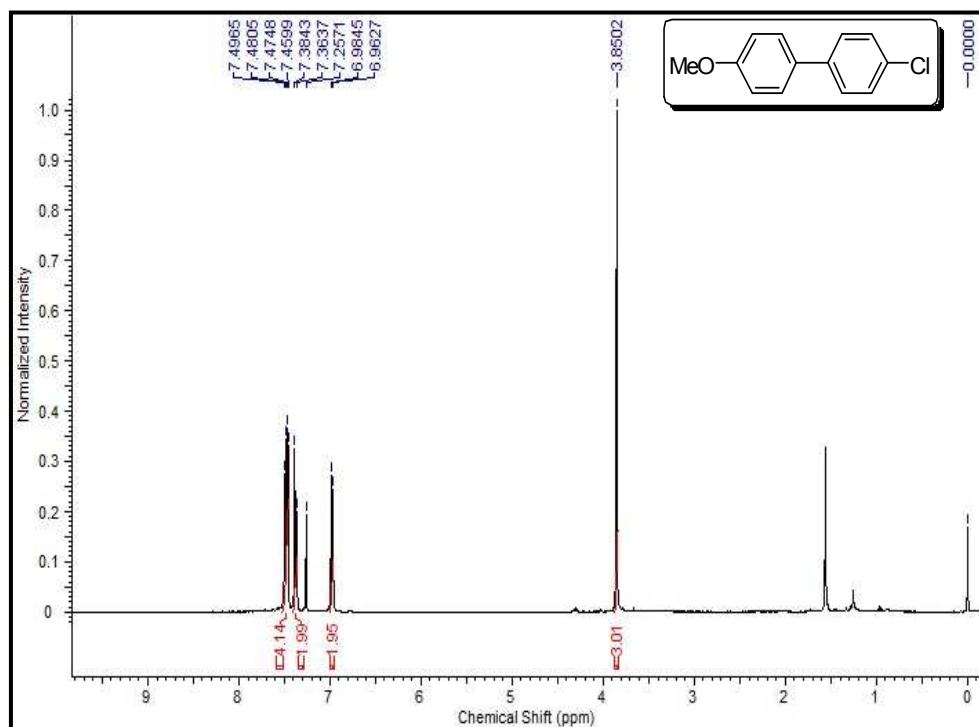

Figure S9

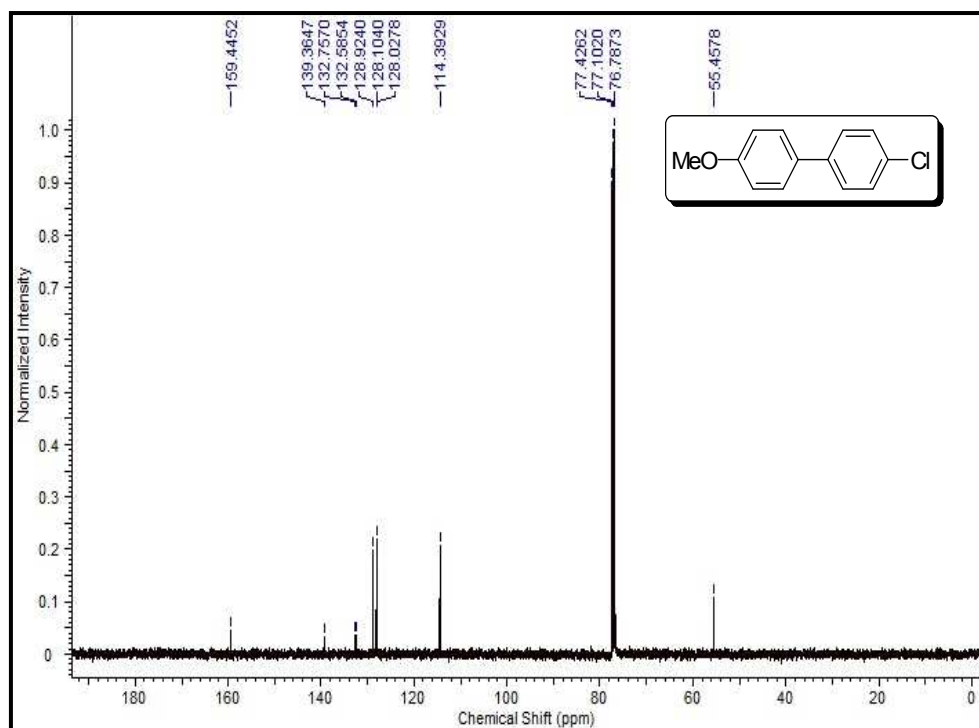

Figure S10

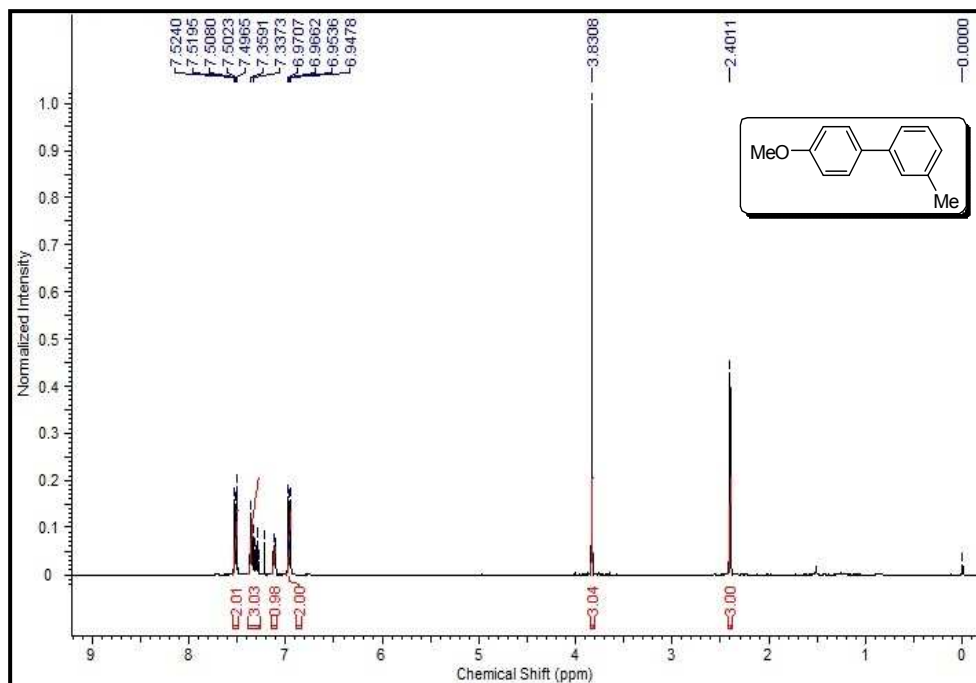

Figure S11

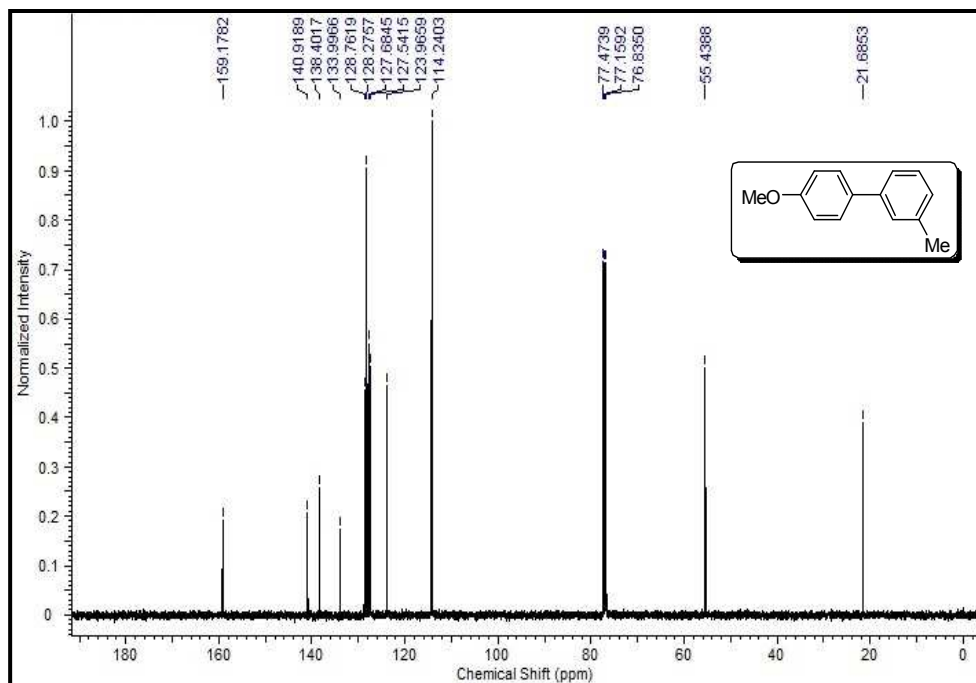

Figure S12

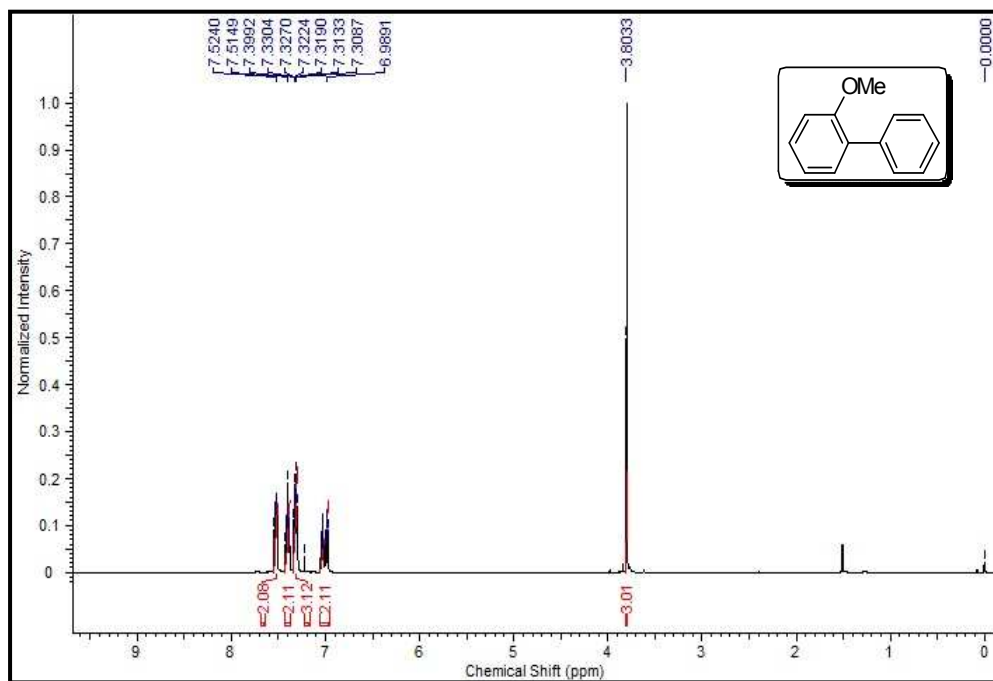

Figure S13

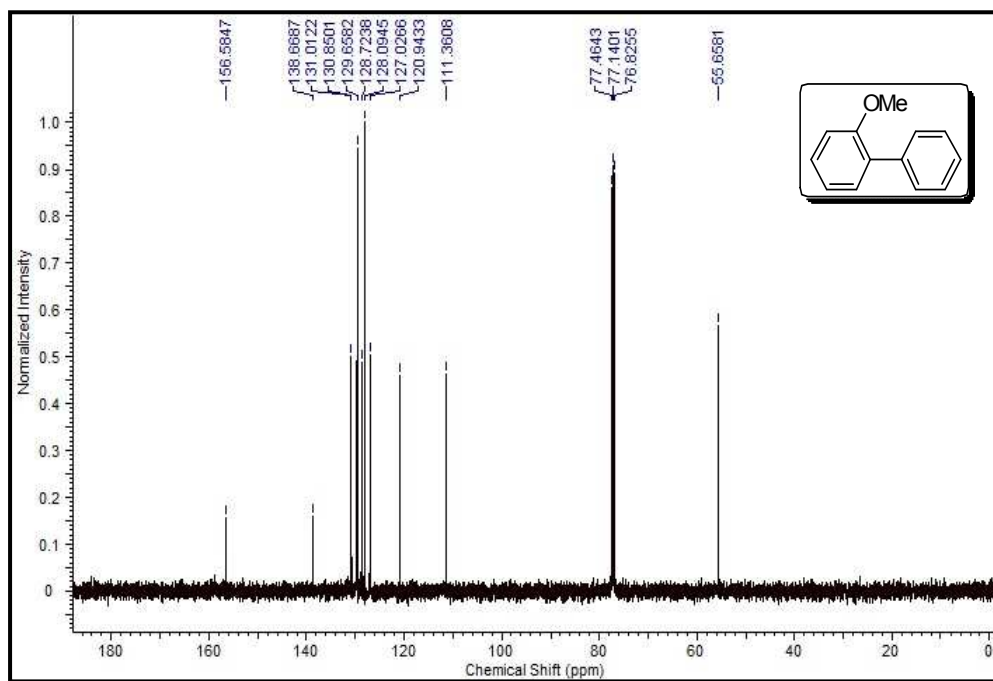

Figure S14



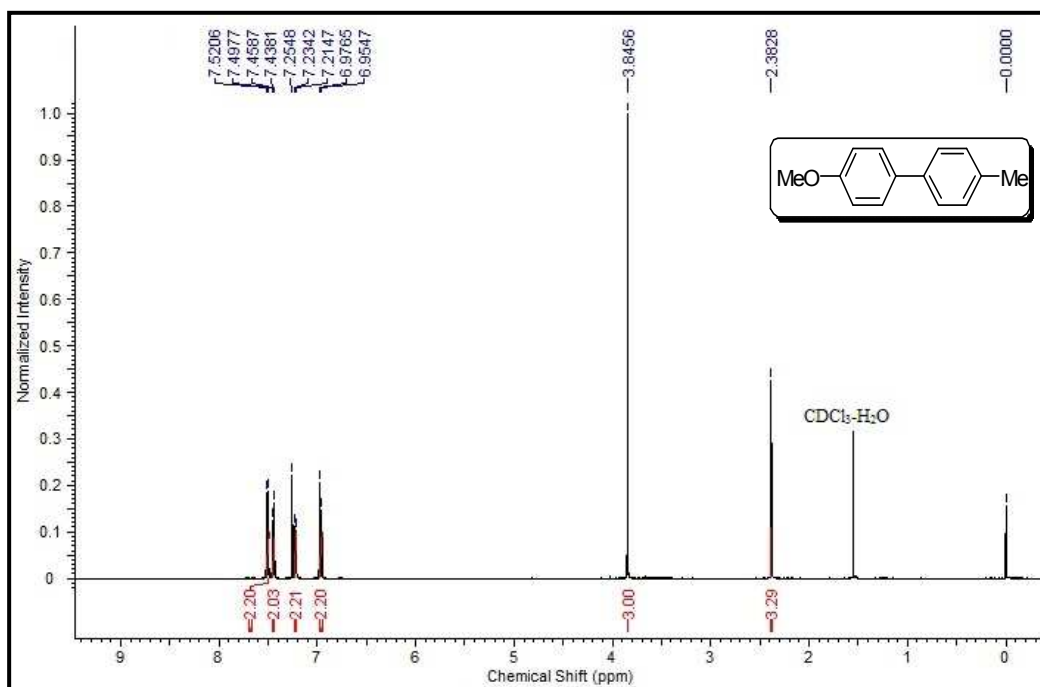

Figure S15

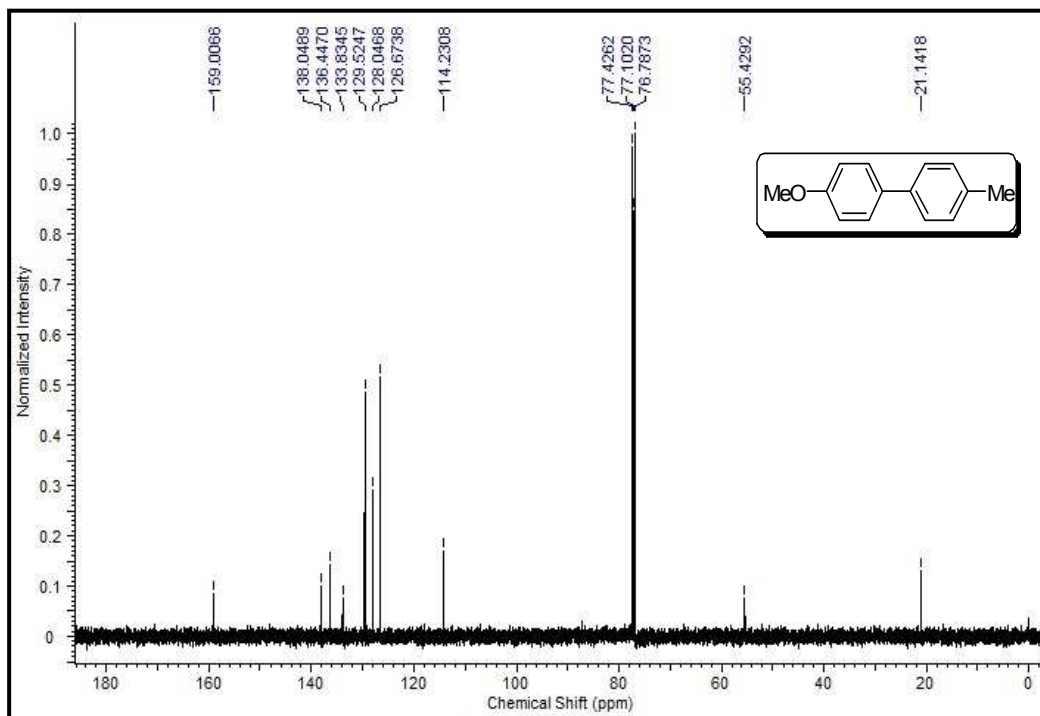

Figure S16

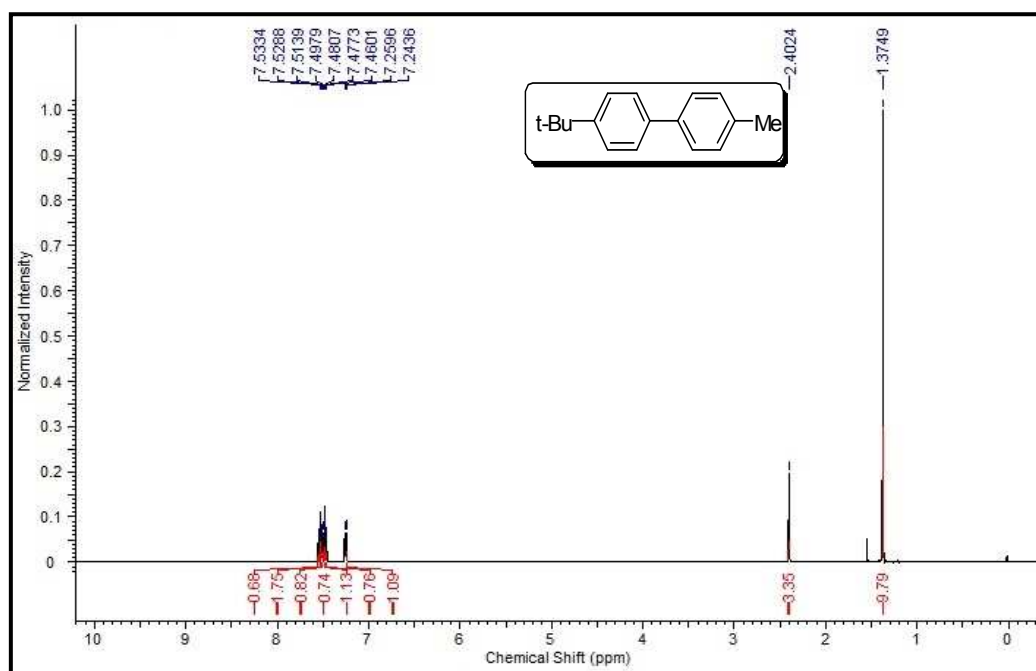

Figure S17

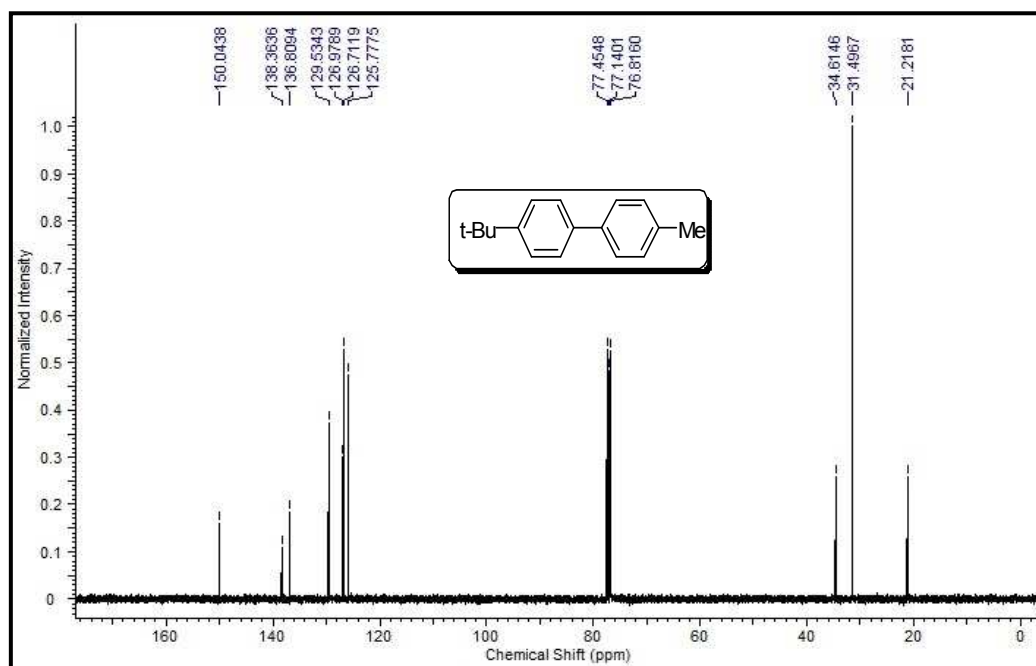

Figure S18

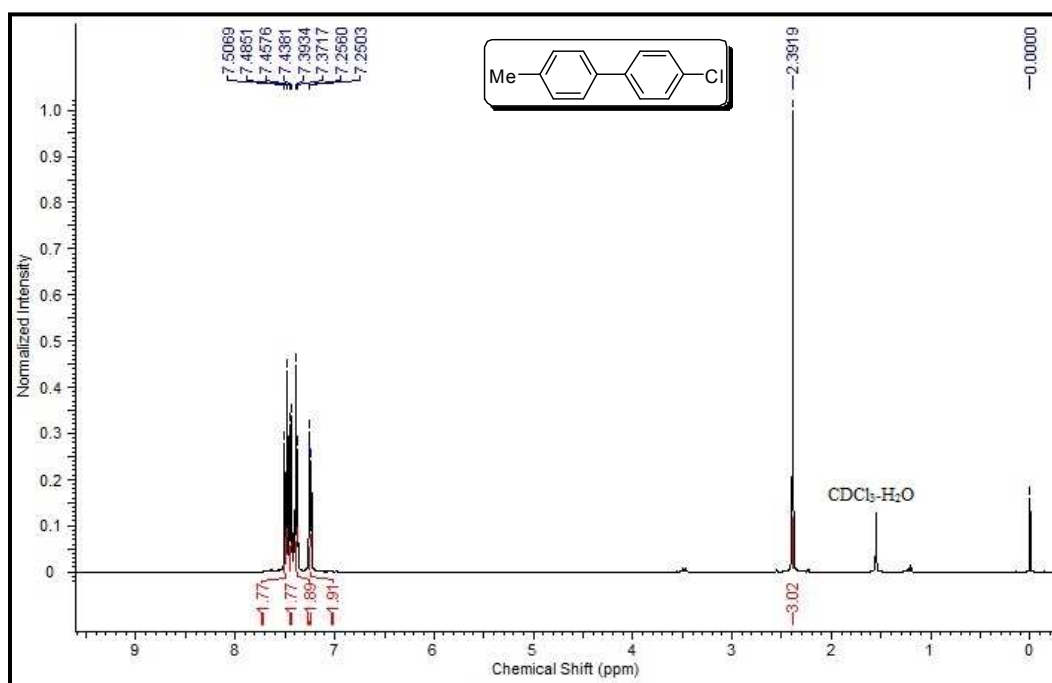

Figure S19

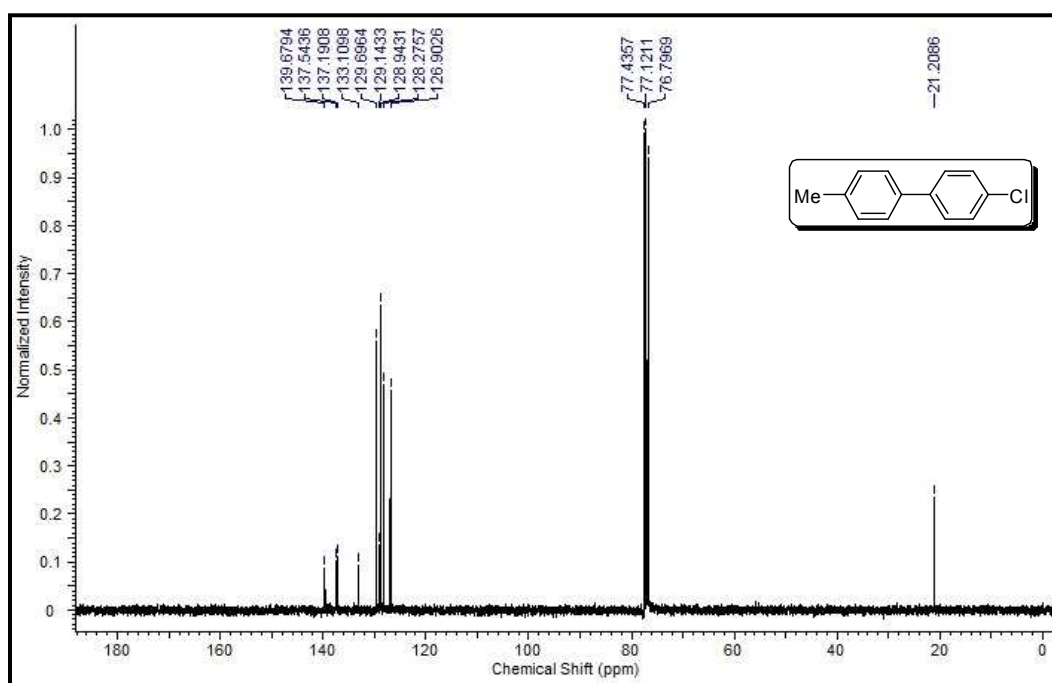

Figure S20

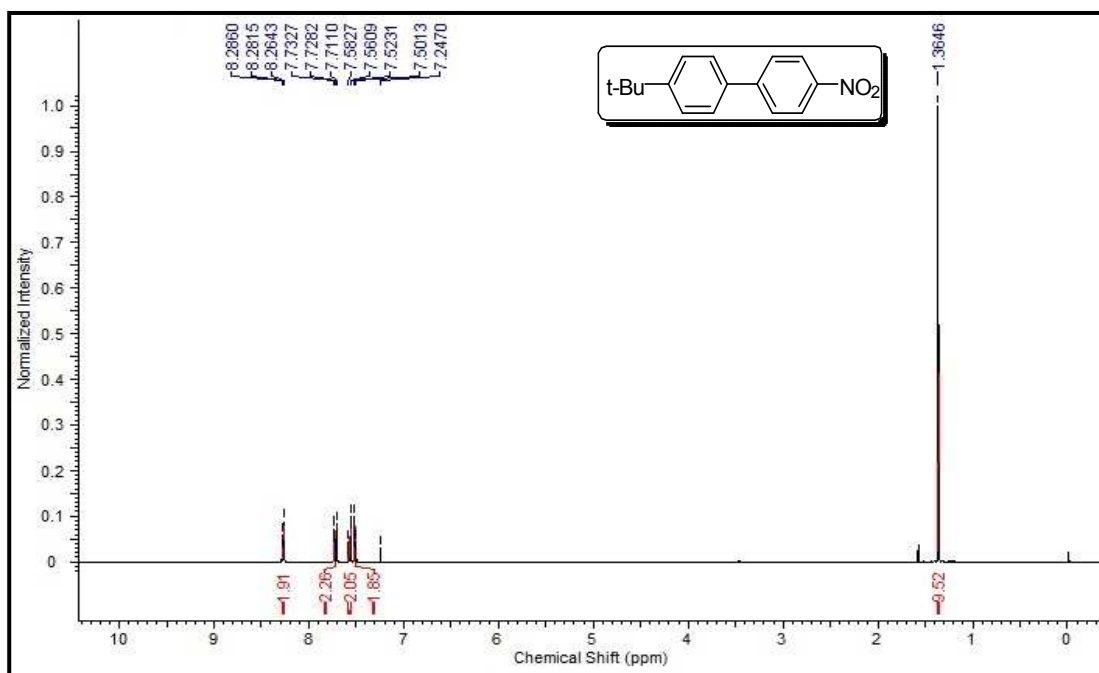

Figure S21

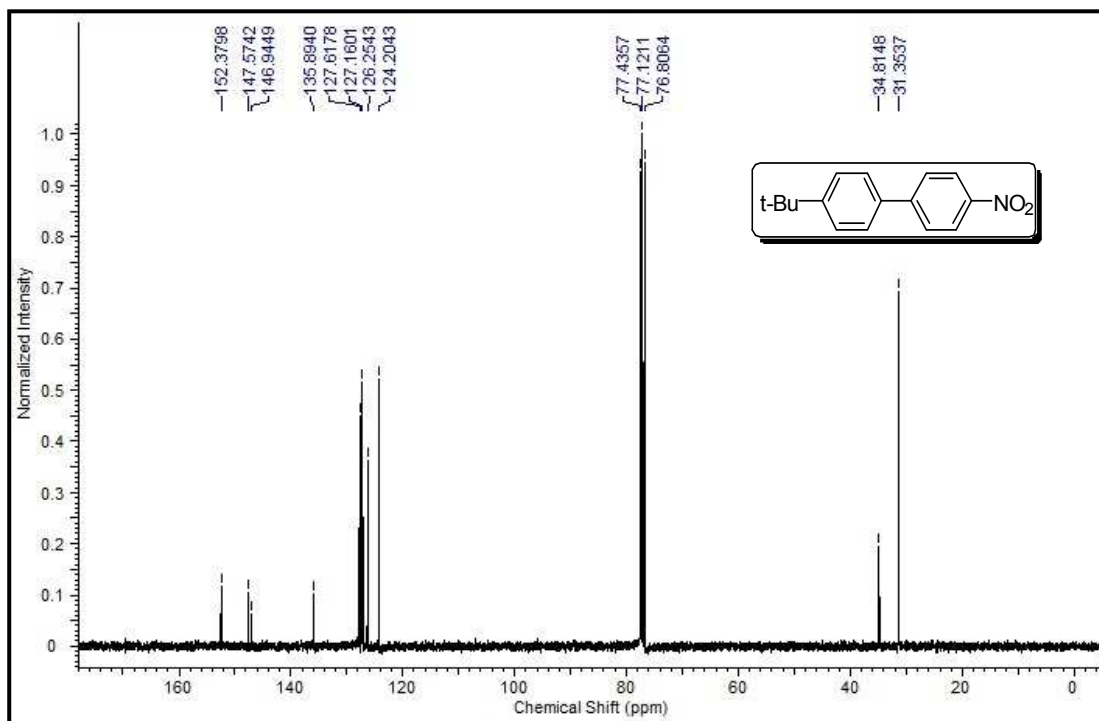

Figure S22

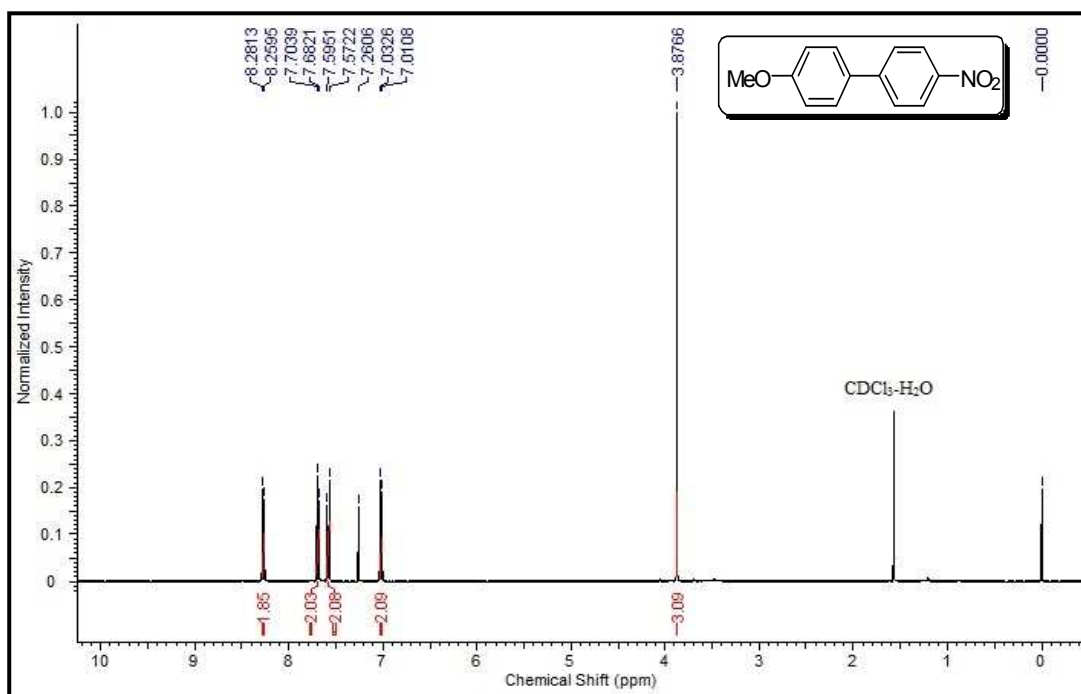

Figure S23

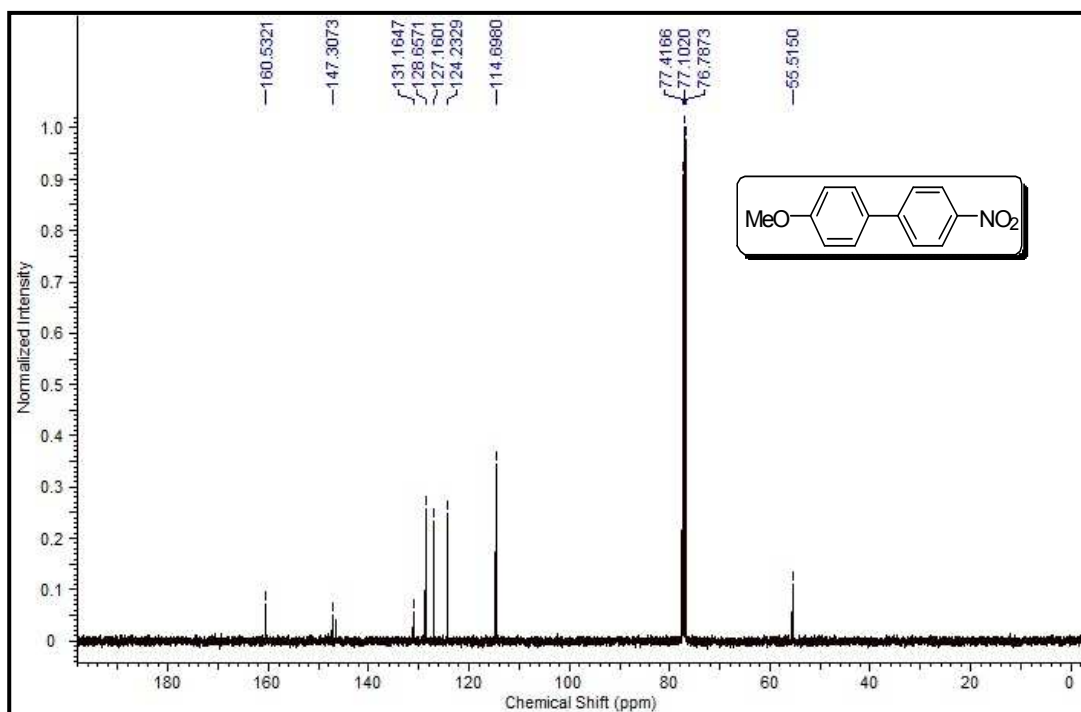

Figure S24

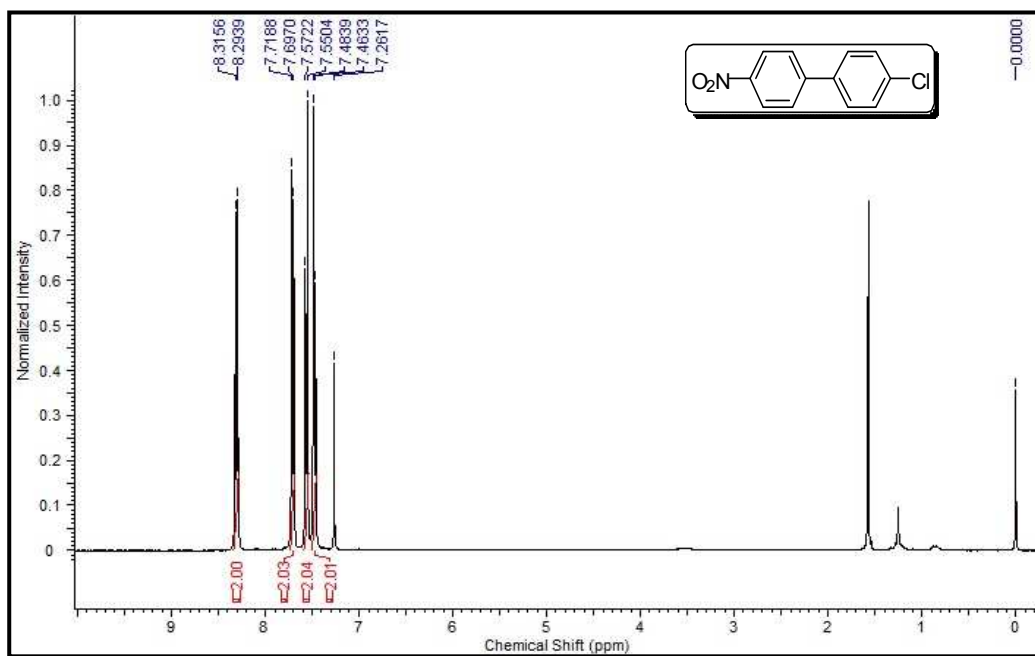

Figure S25

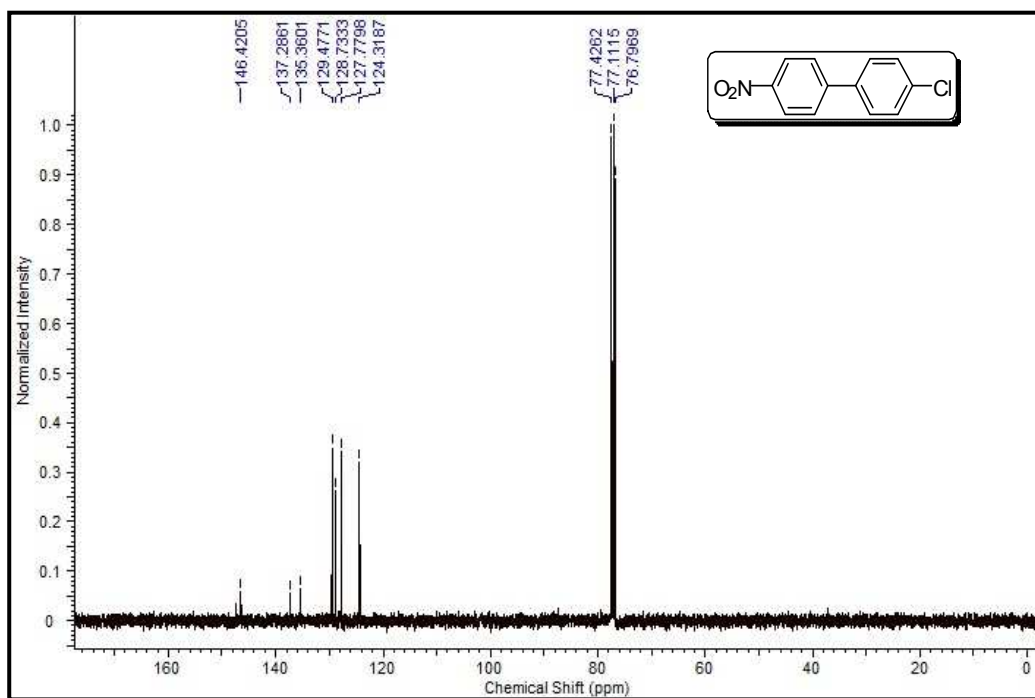

Figure S26

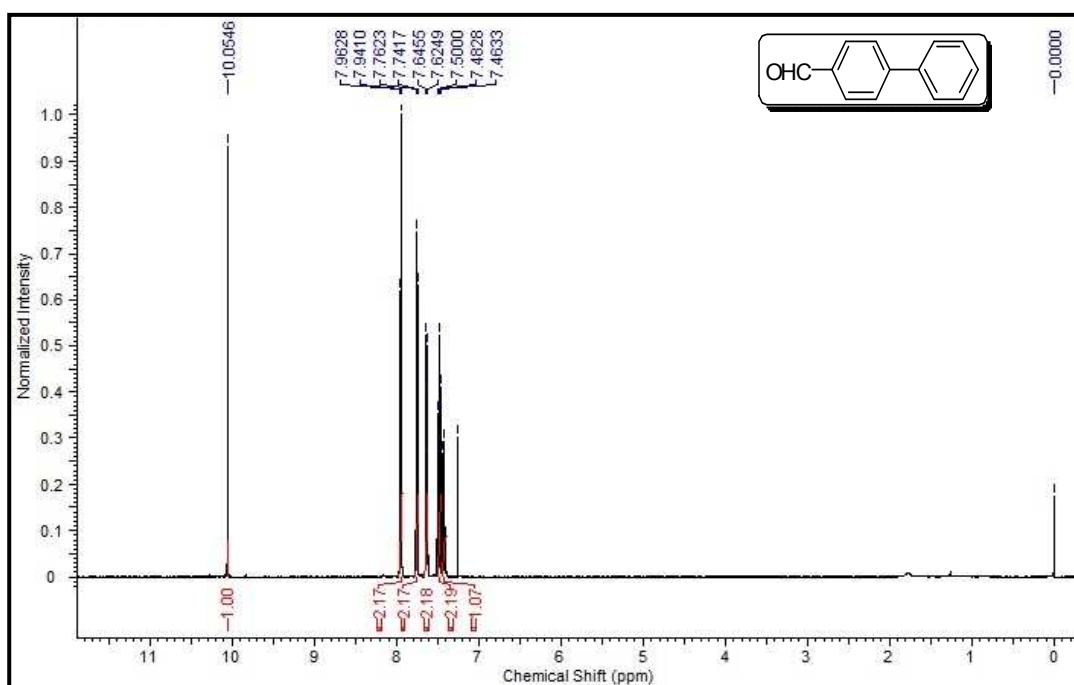

Figure S27

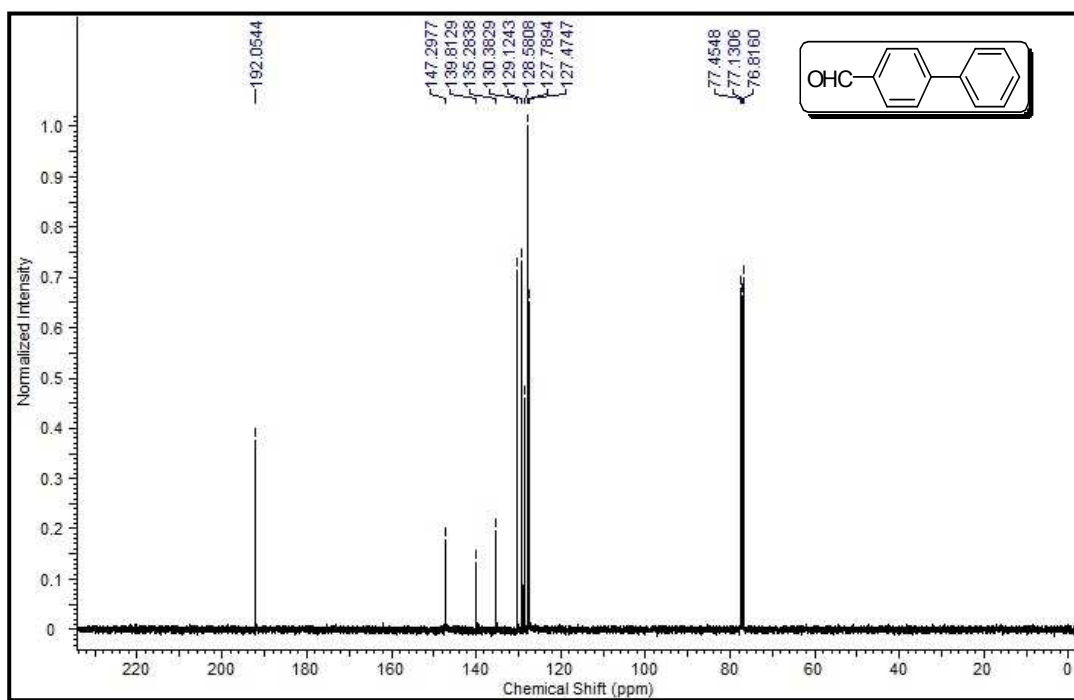

Figure S28

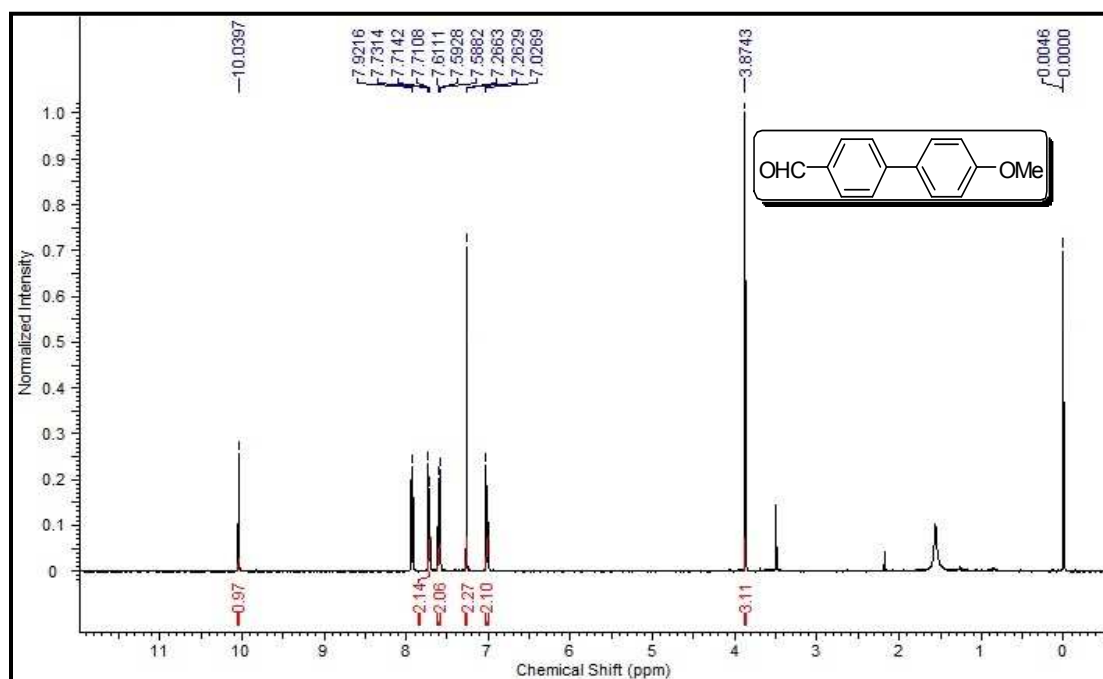

Figure S29

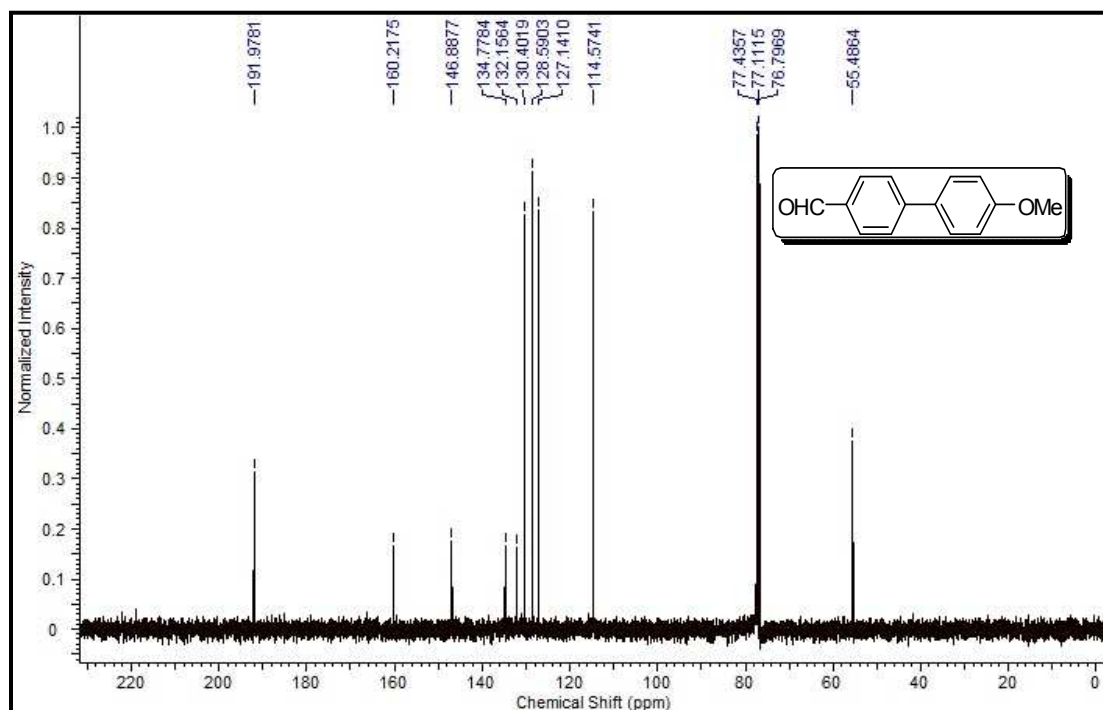

Figure S30



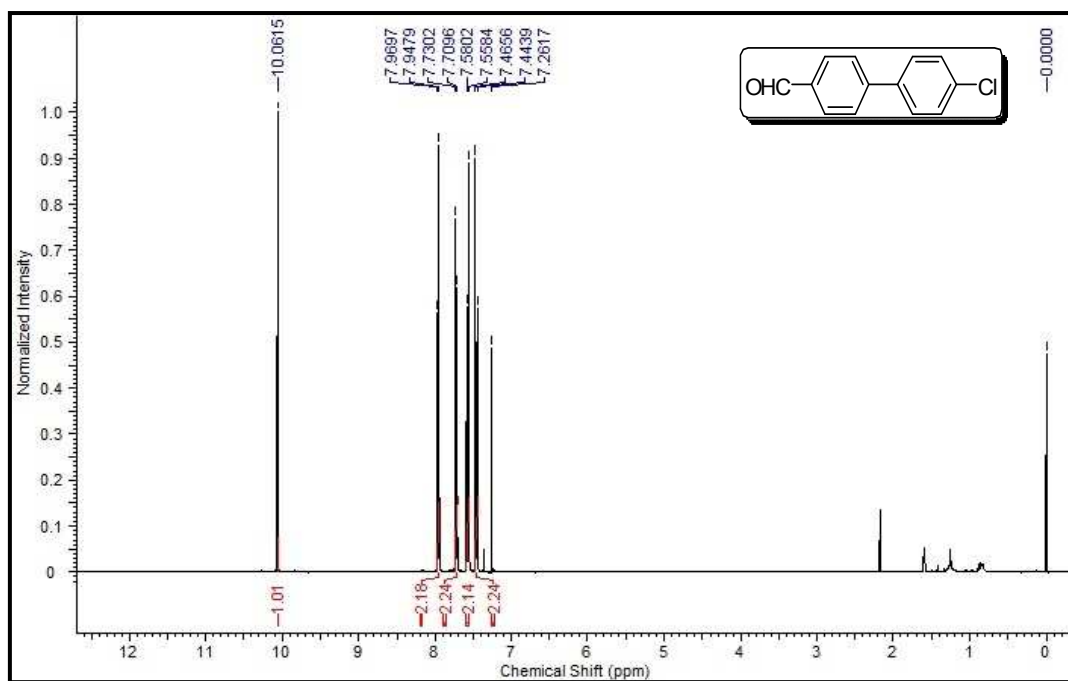

Figure S31

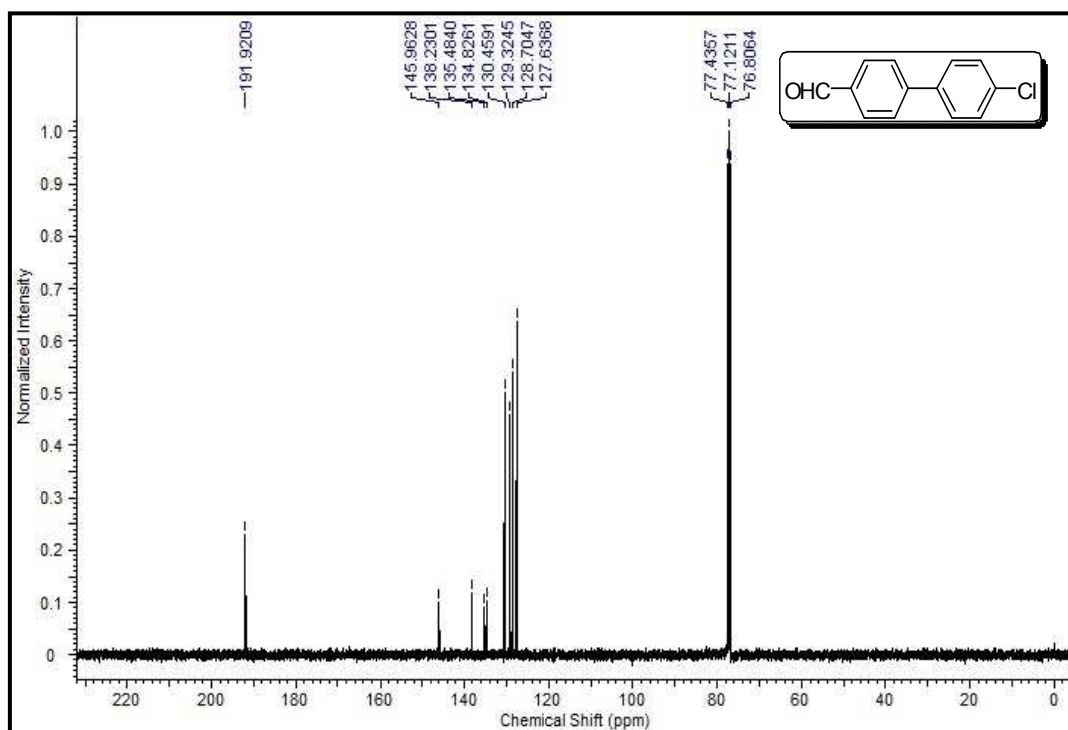

Figure S32

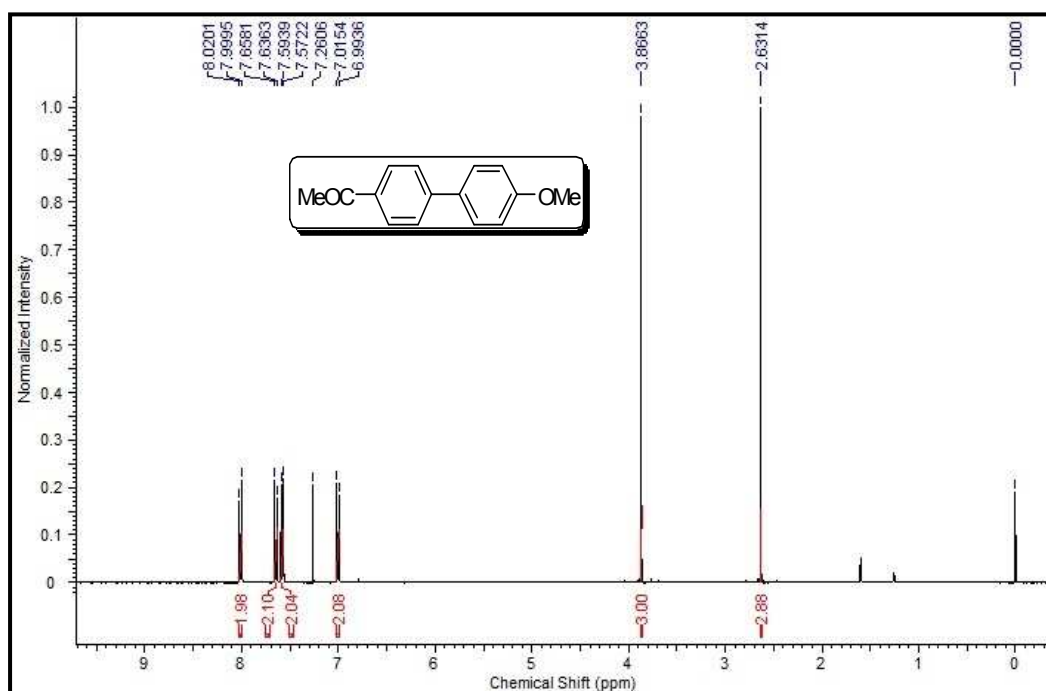

Figure S33

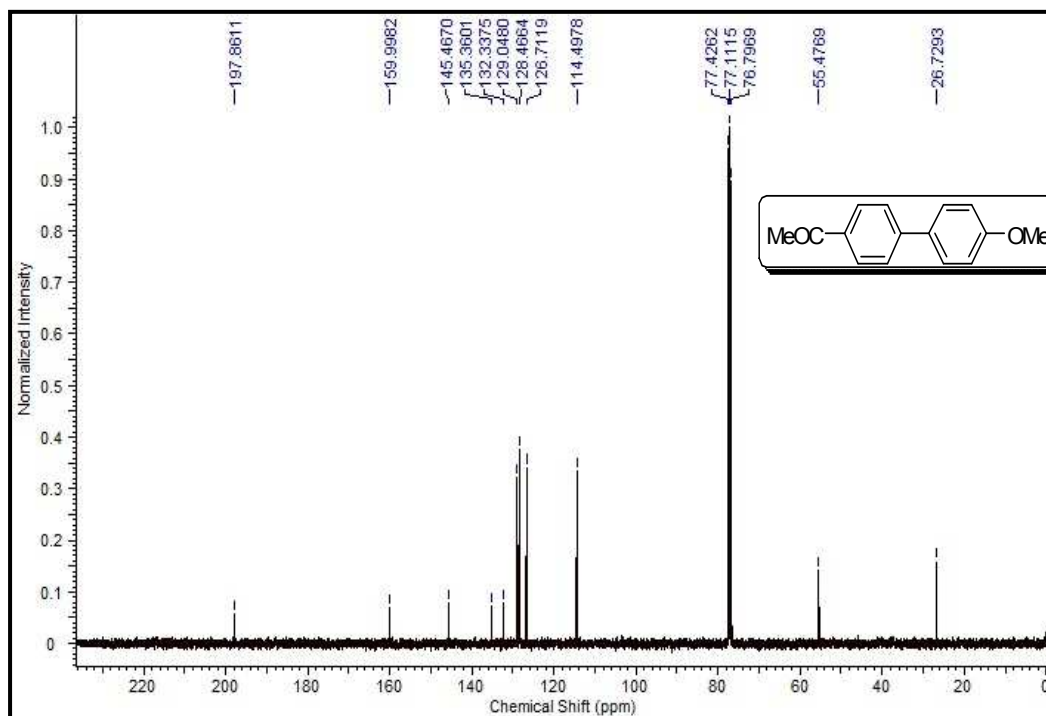

Figure S34

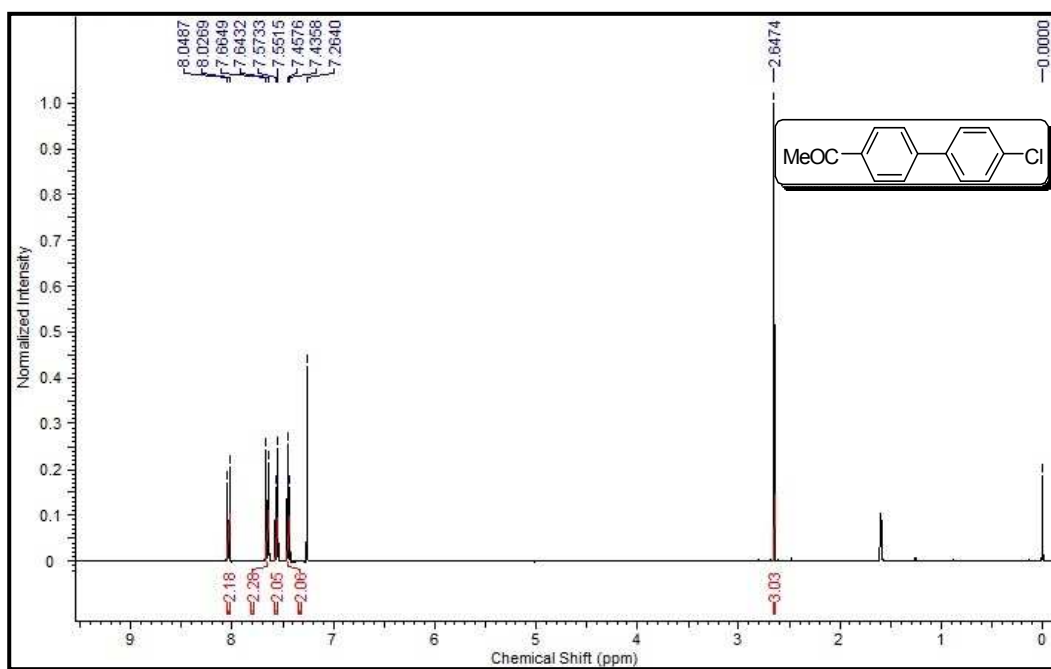

Figure S35

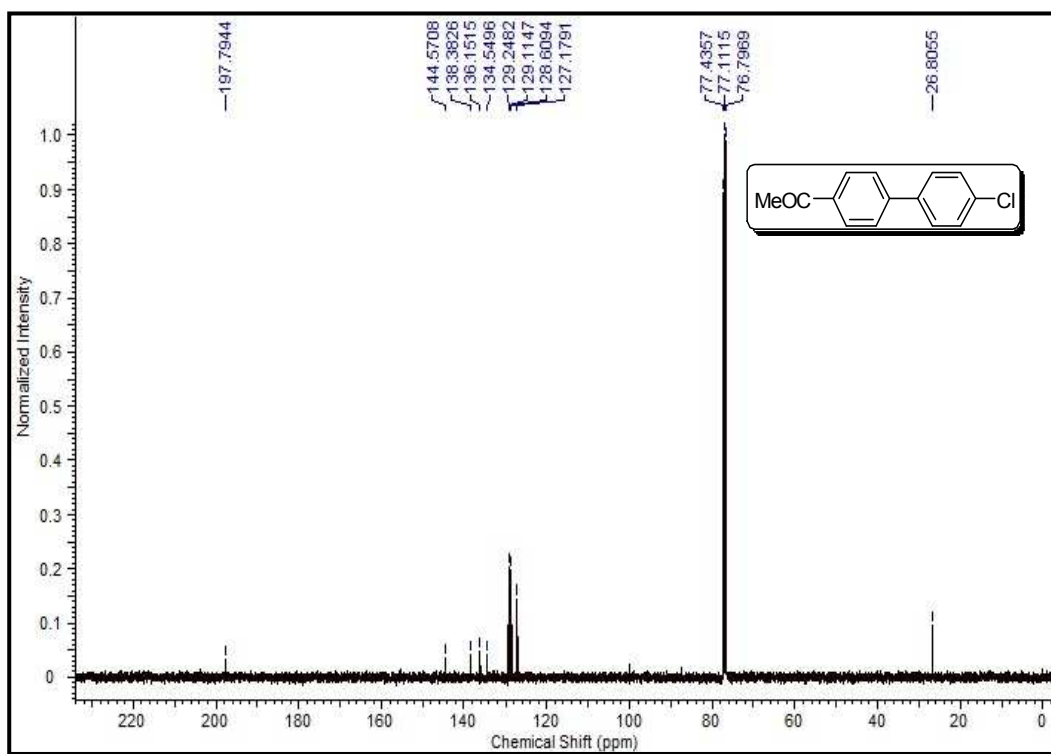

Figure S36

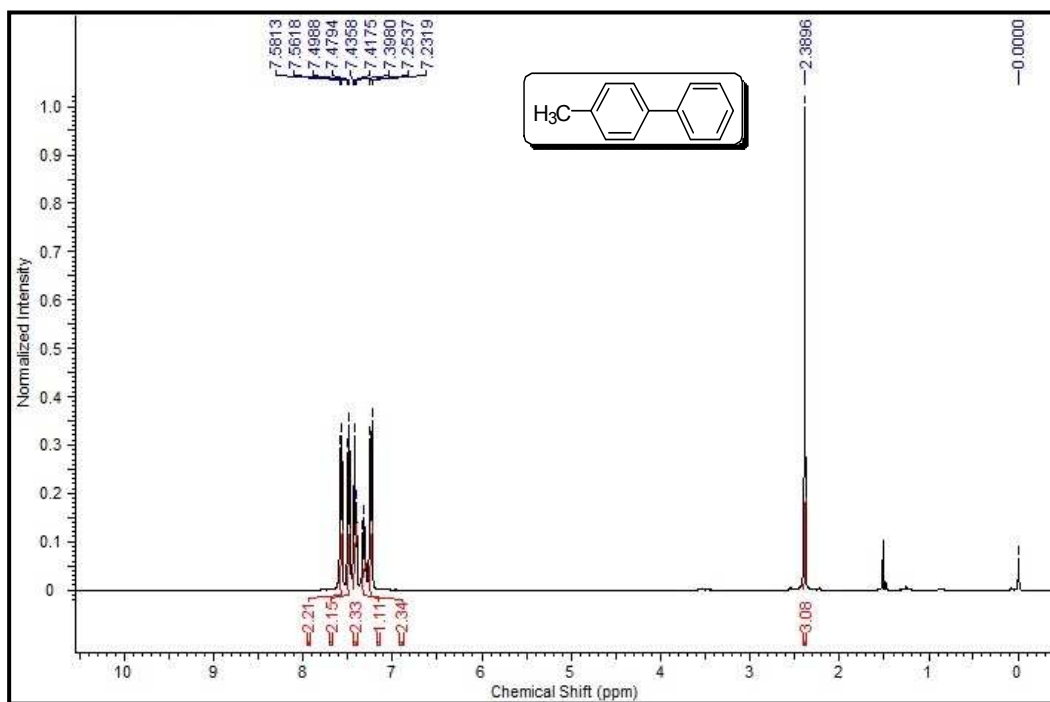

Figure S37

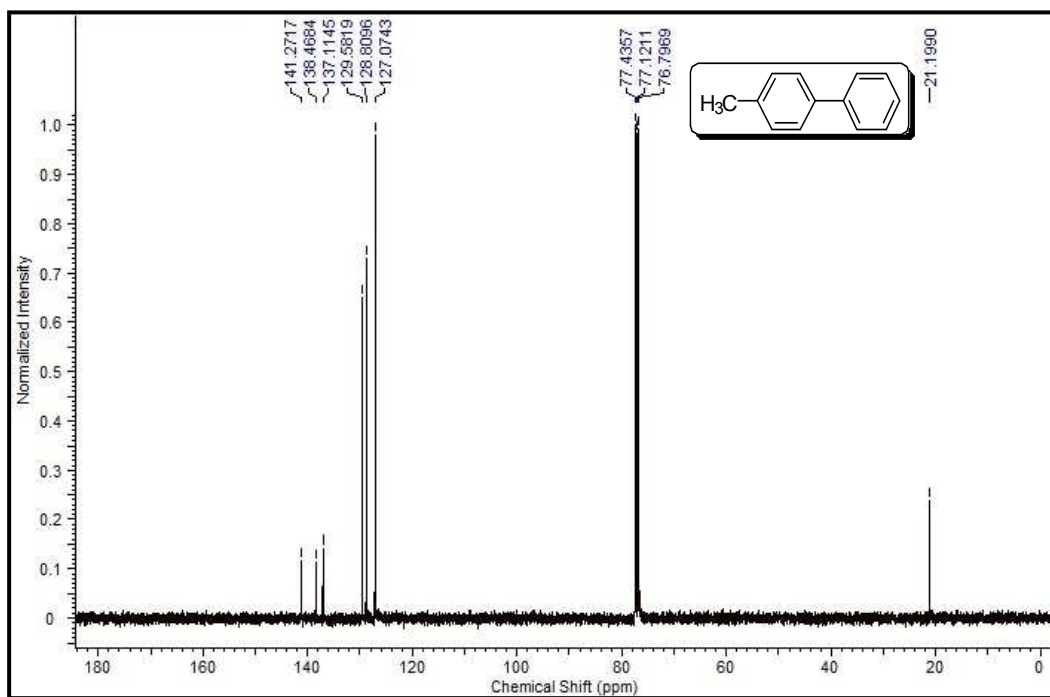

Figure S38

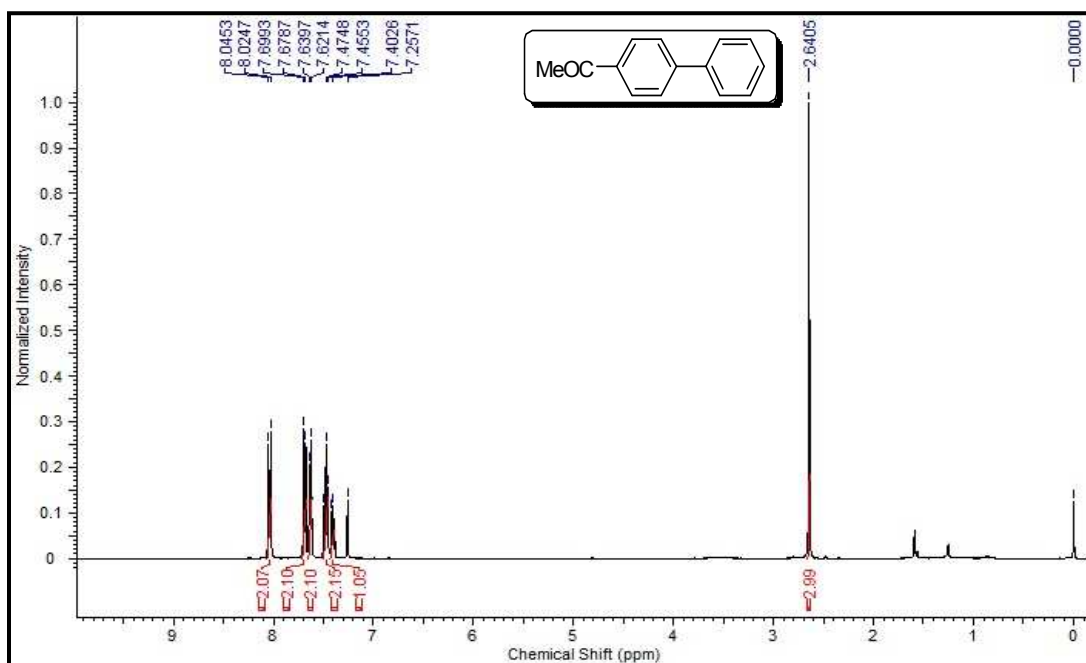

Figure S39

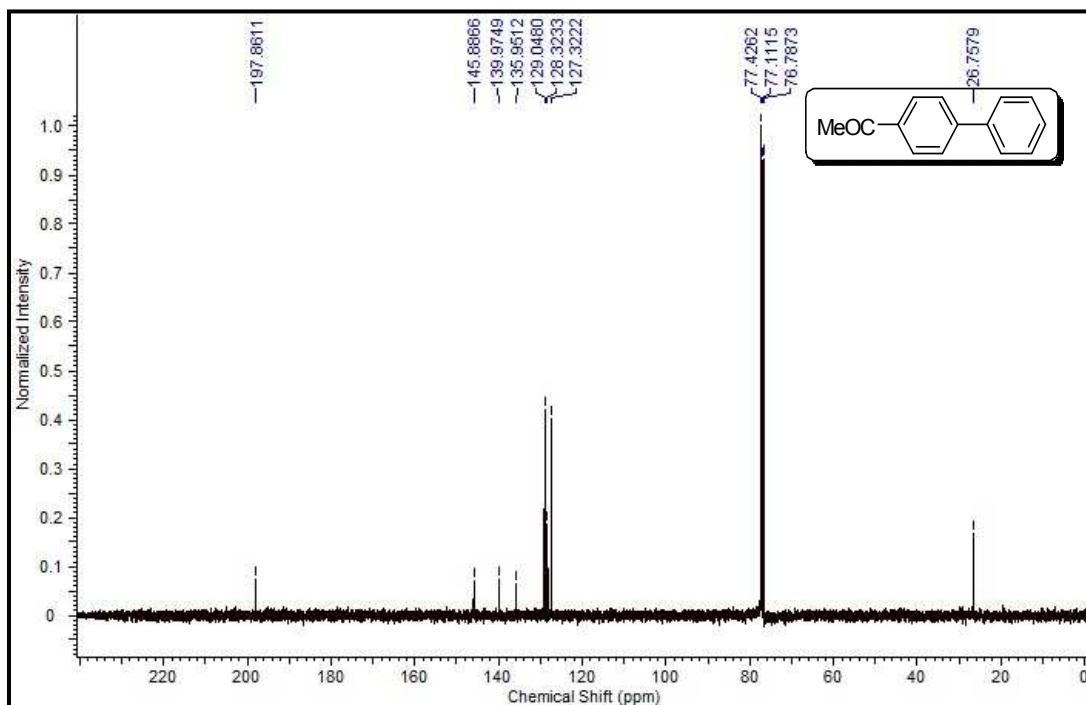

Figure S40

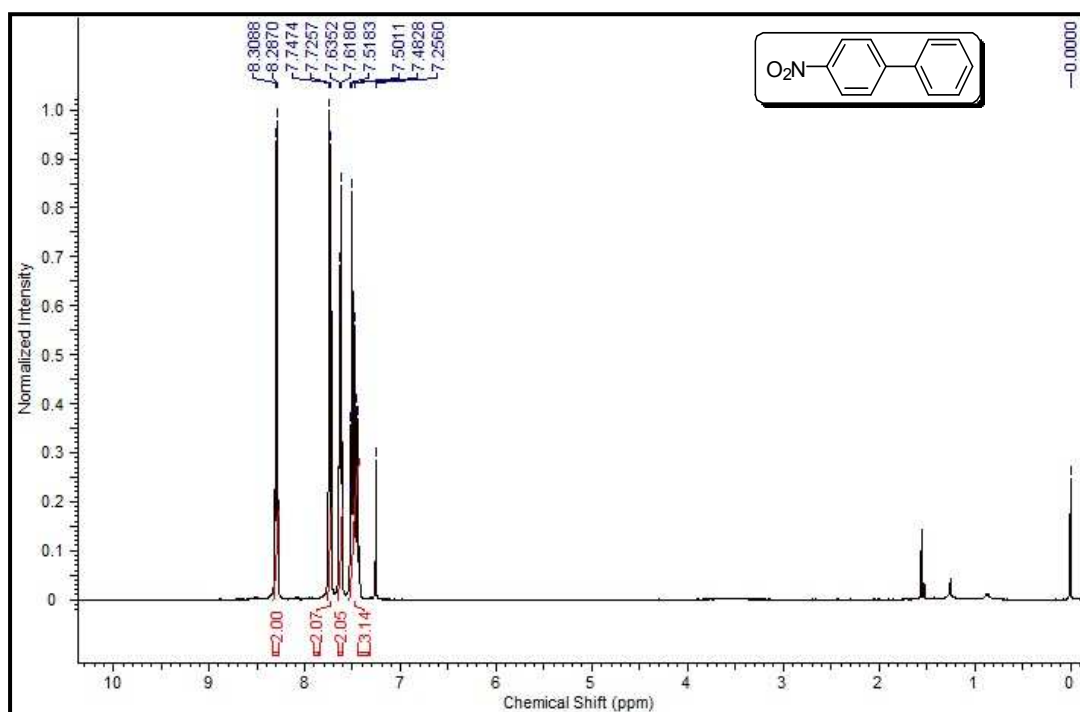

Figure S41

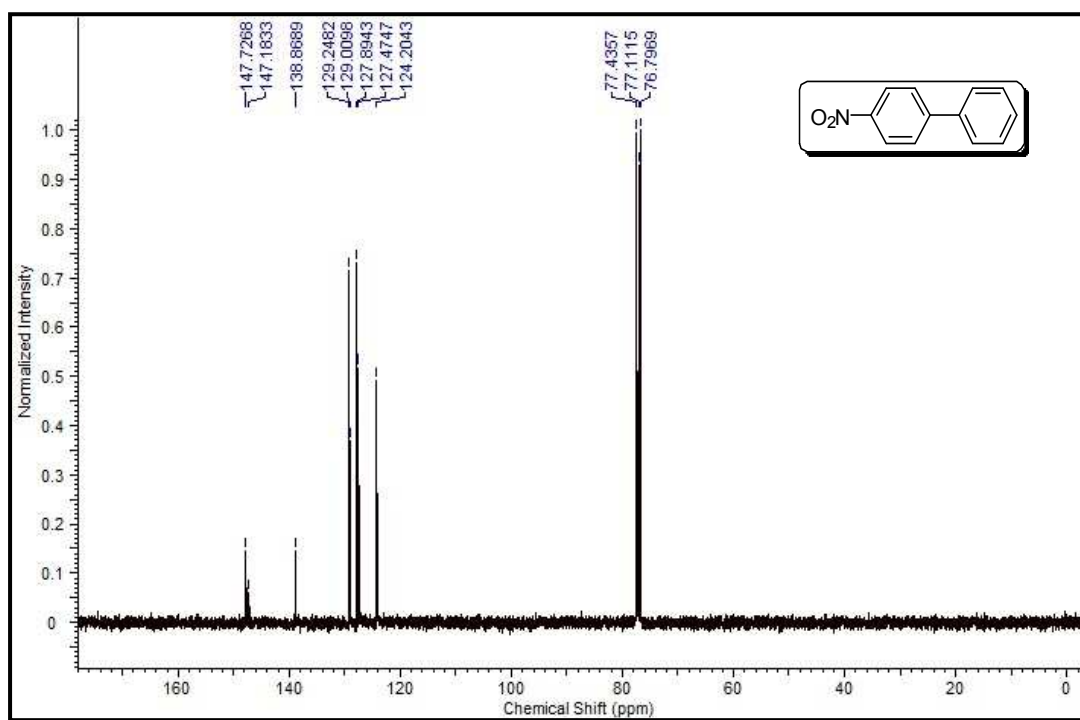

Figure S42

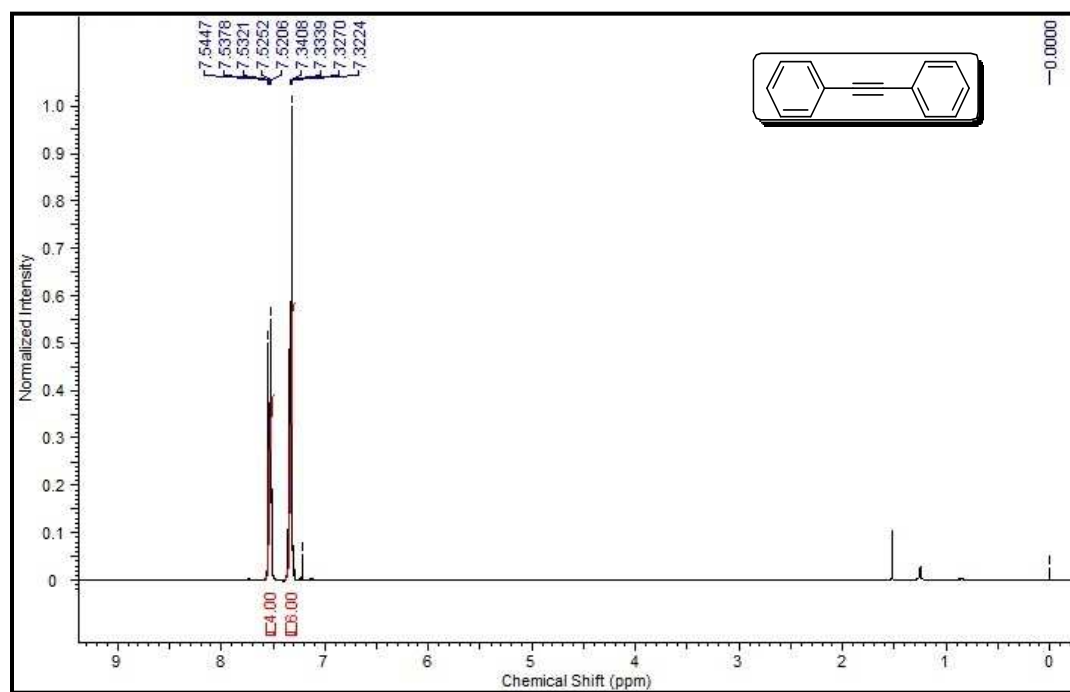

Figure S43

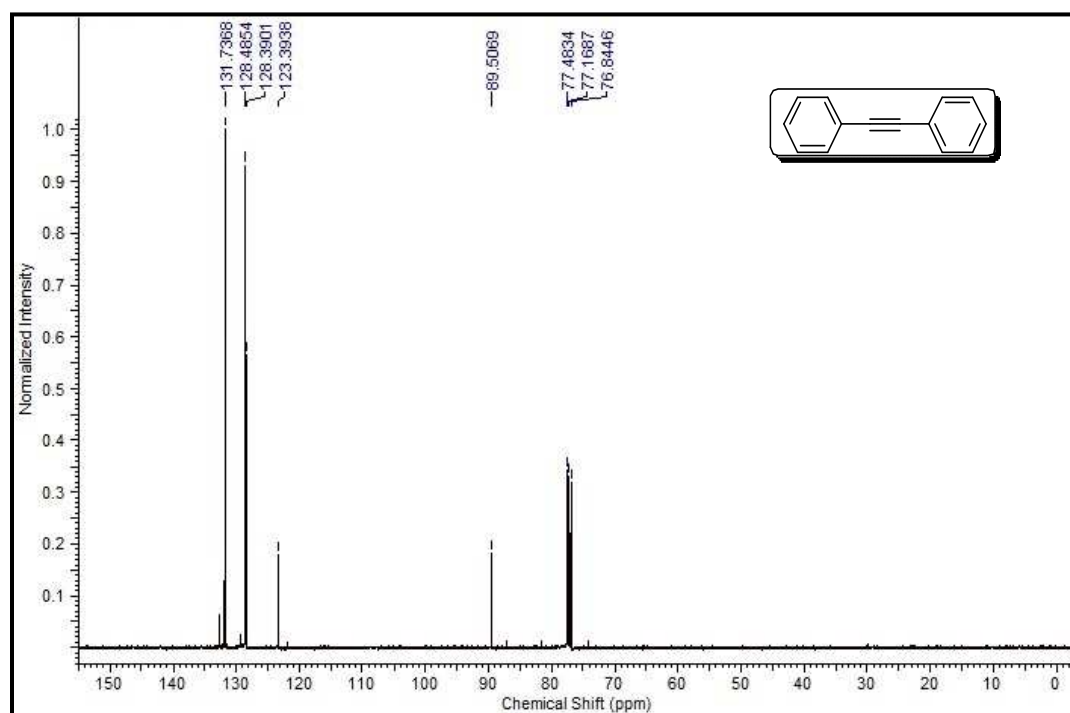

Figure S44

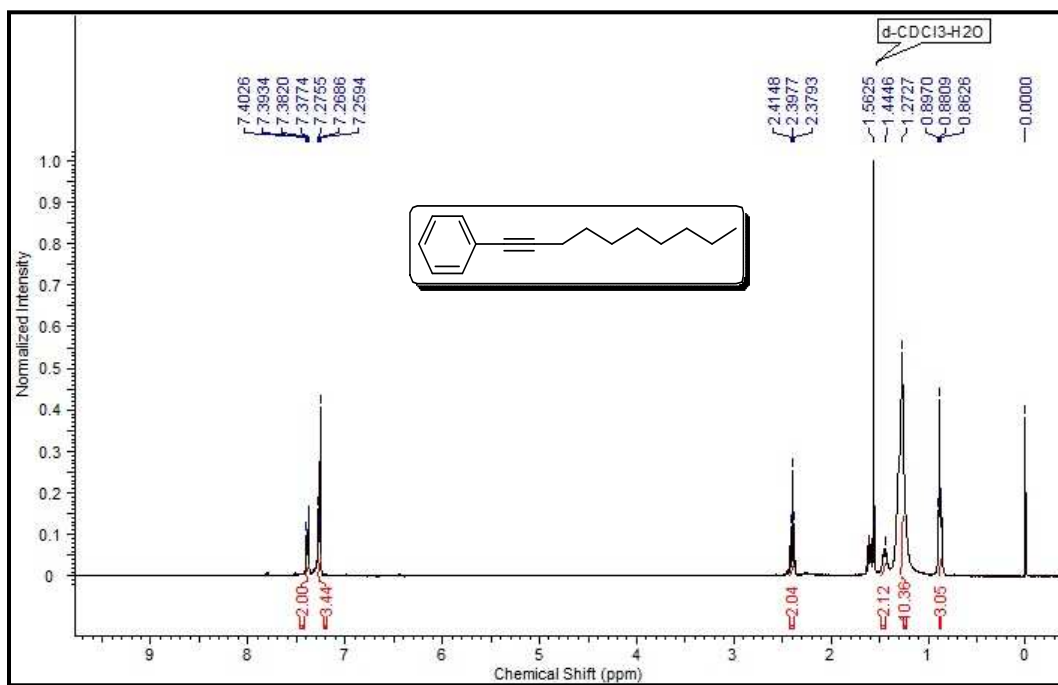

Figure S45

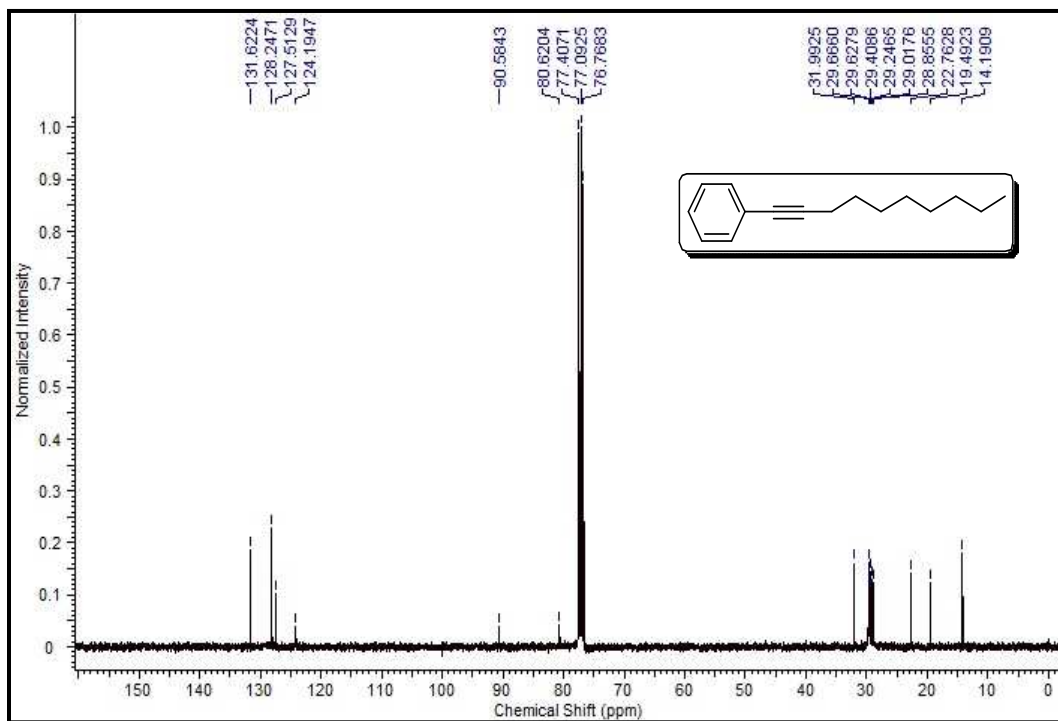

Figure S46



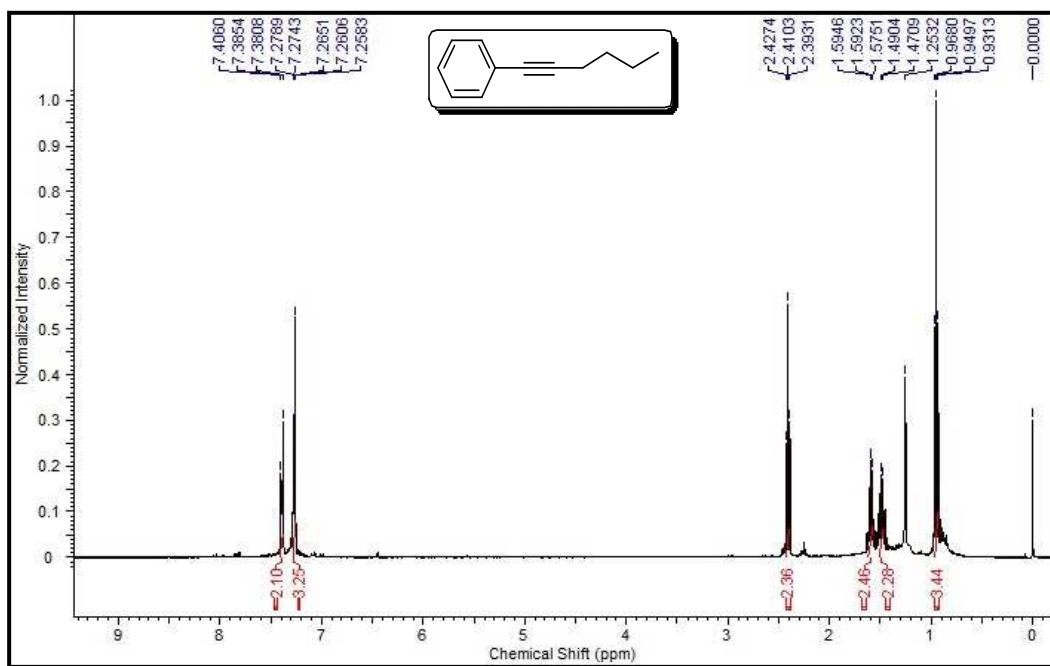

Figure S47

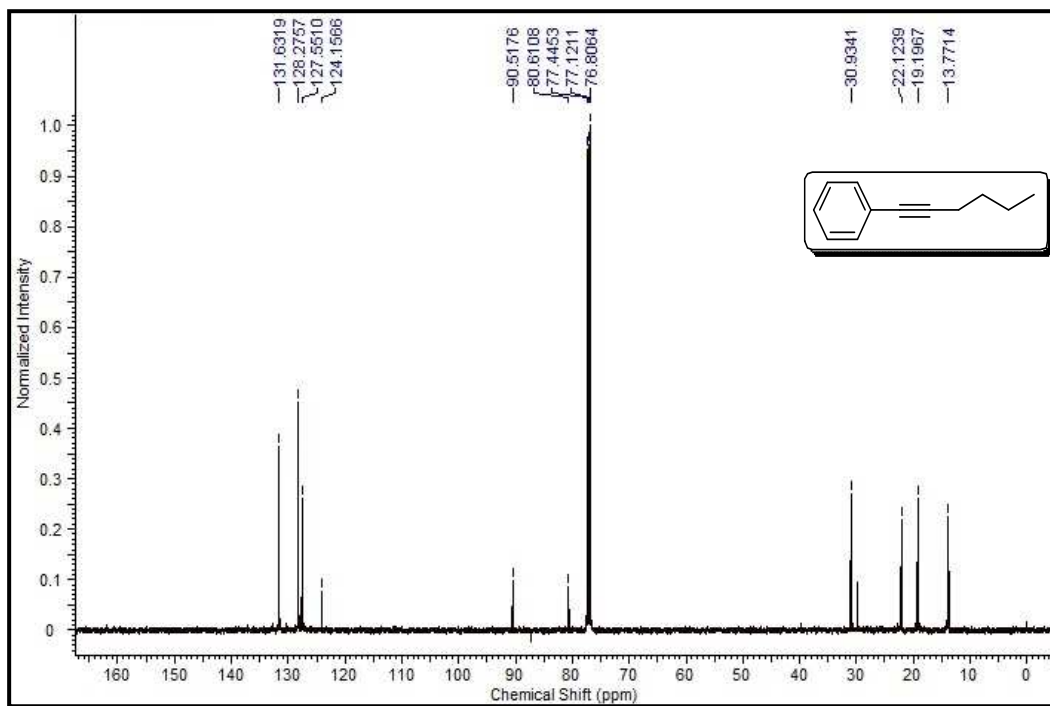

Figure S48

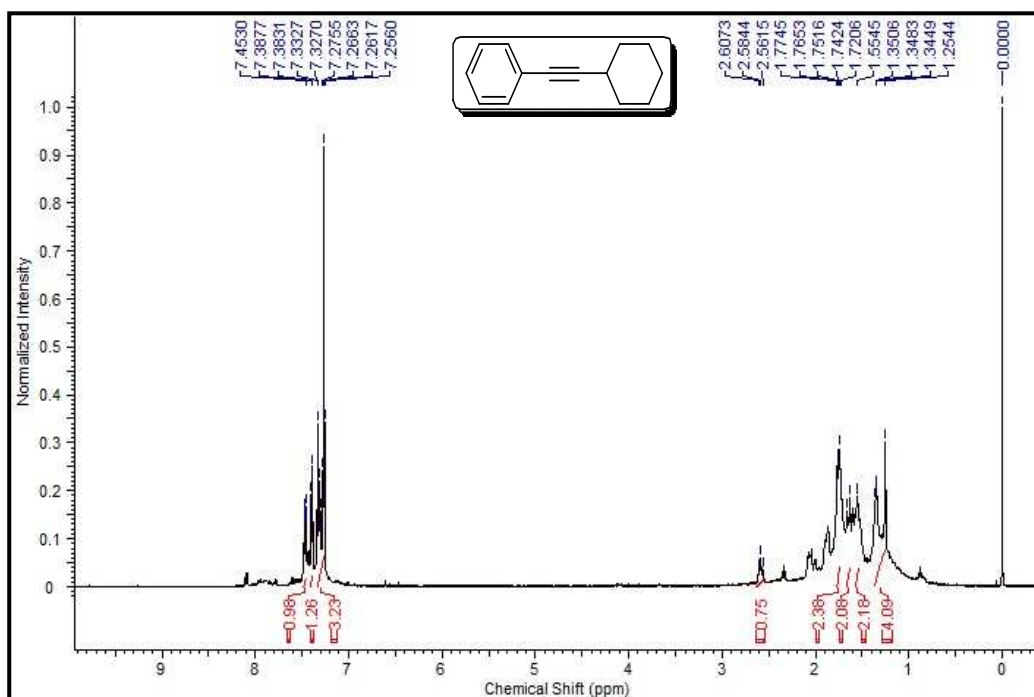

Figure S49

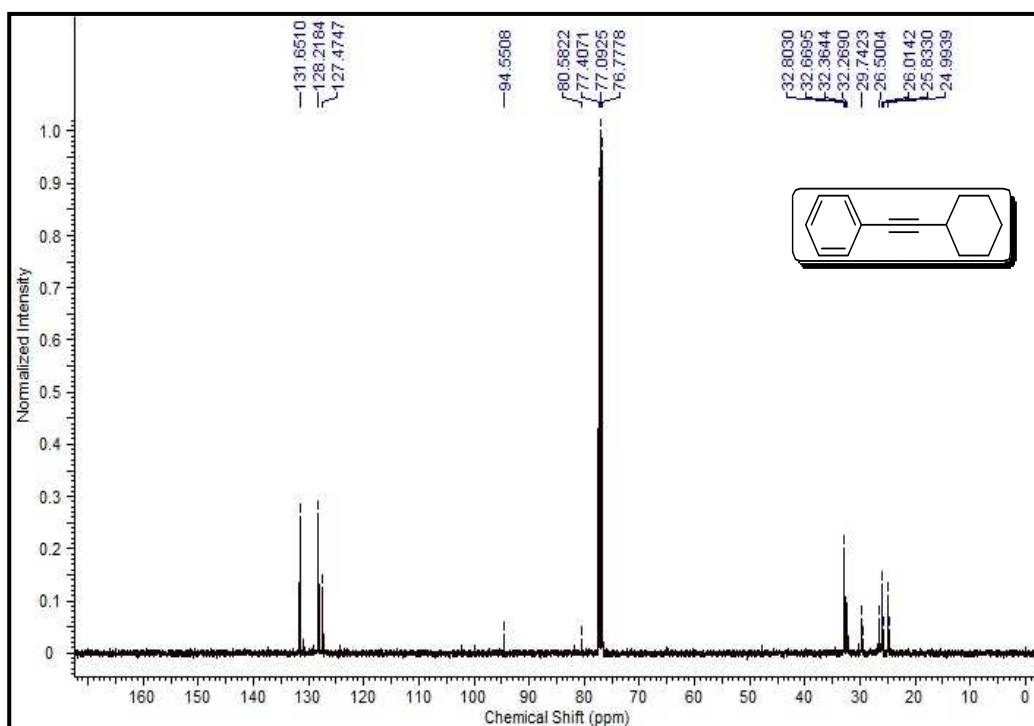

Figure S50

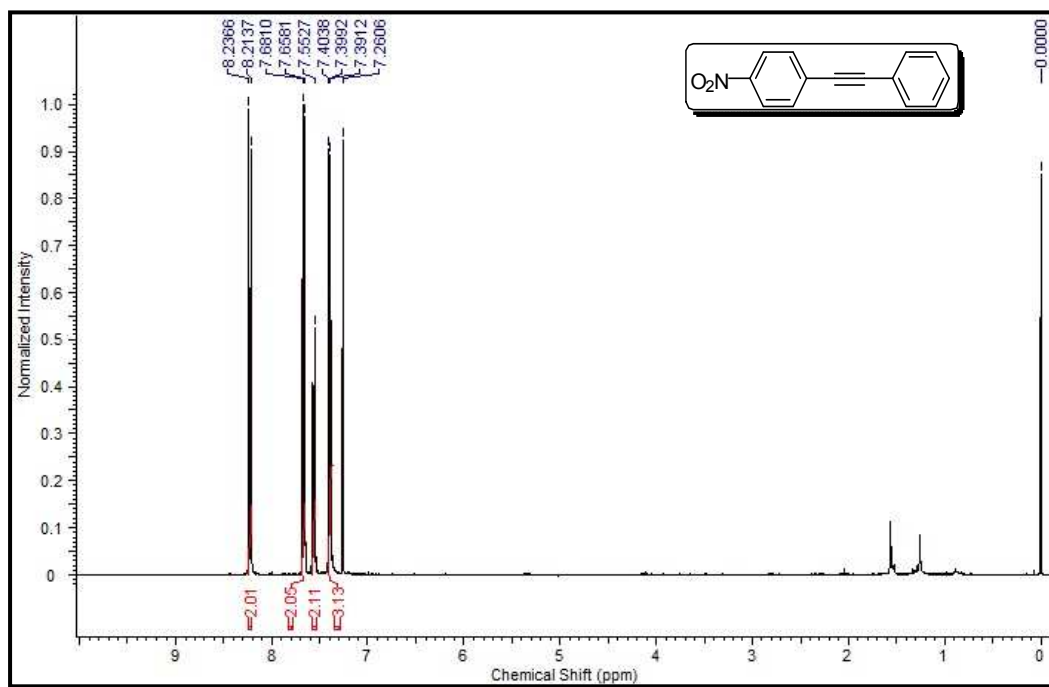

Figure S51

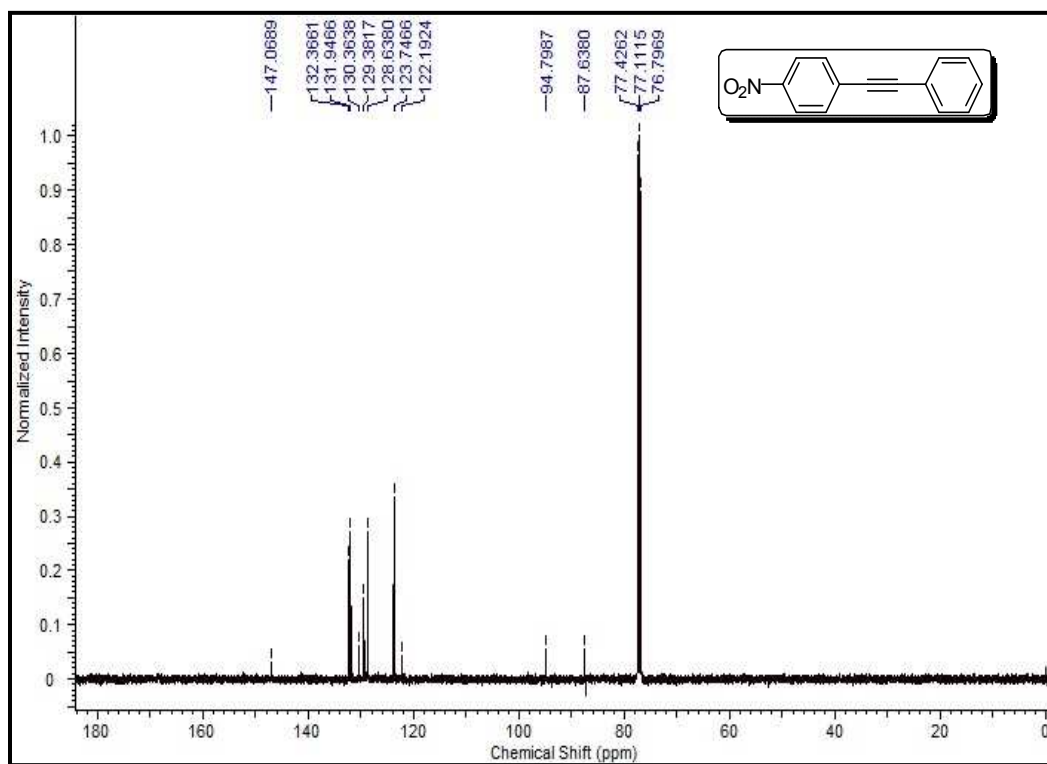

Figure S52

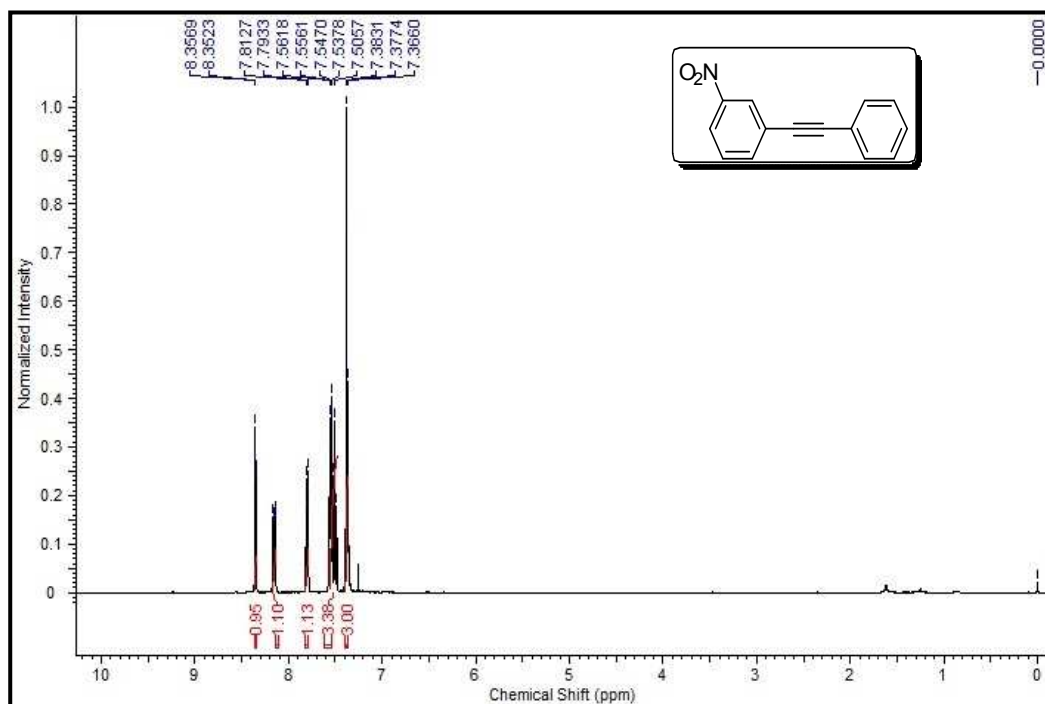

**Figure S53**

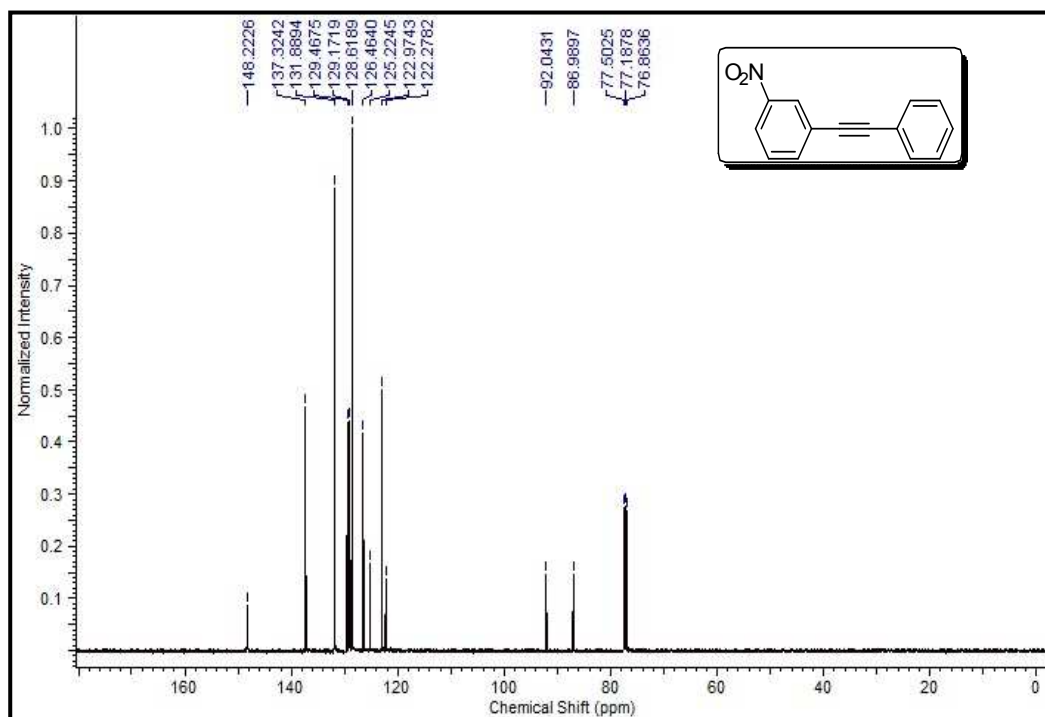

**Figure S54**

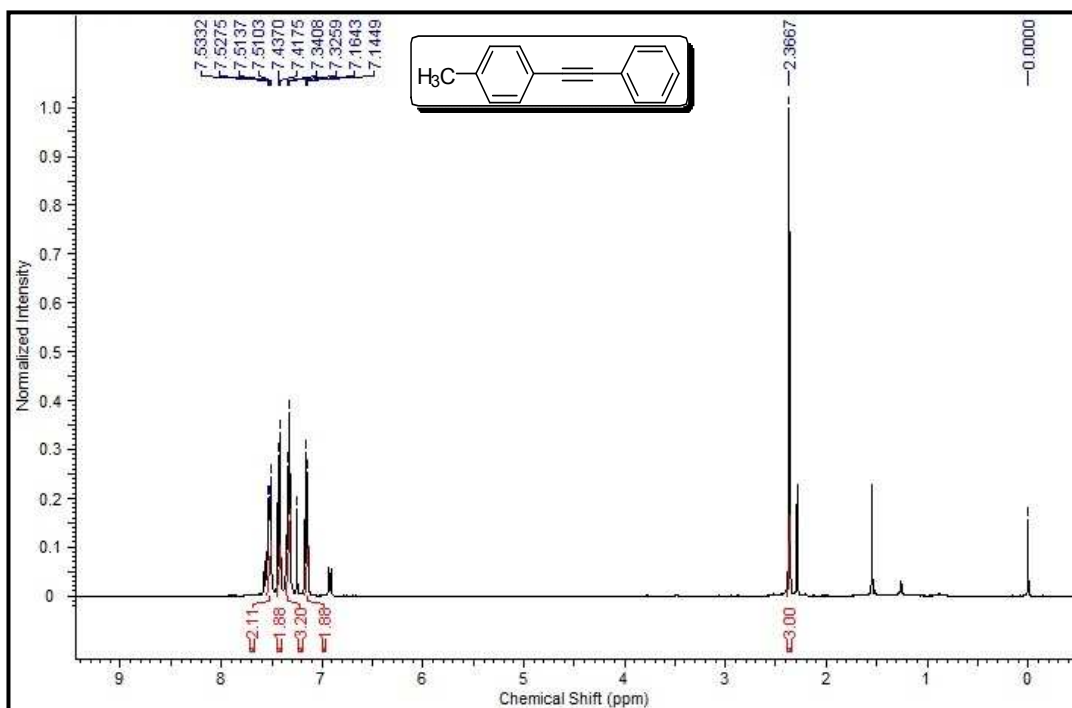

Figure S55

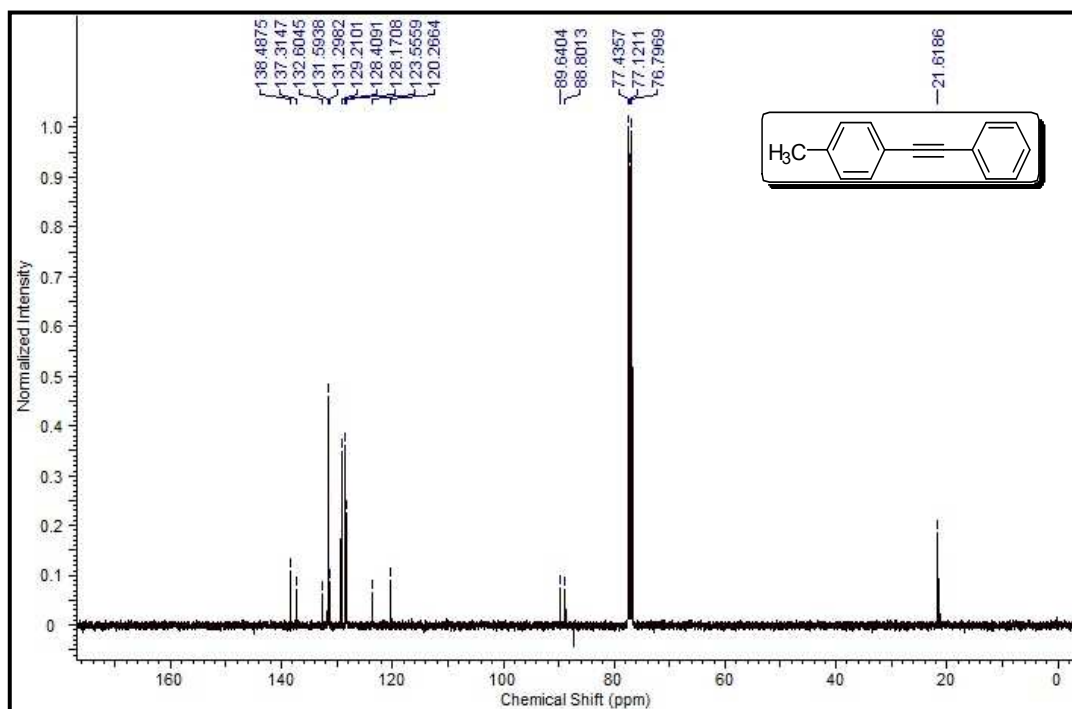

Figure S56

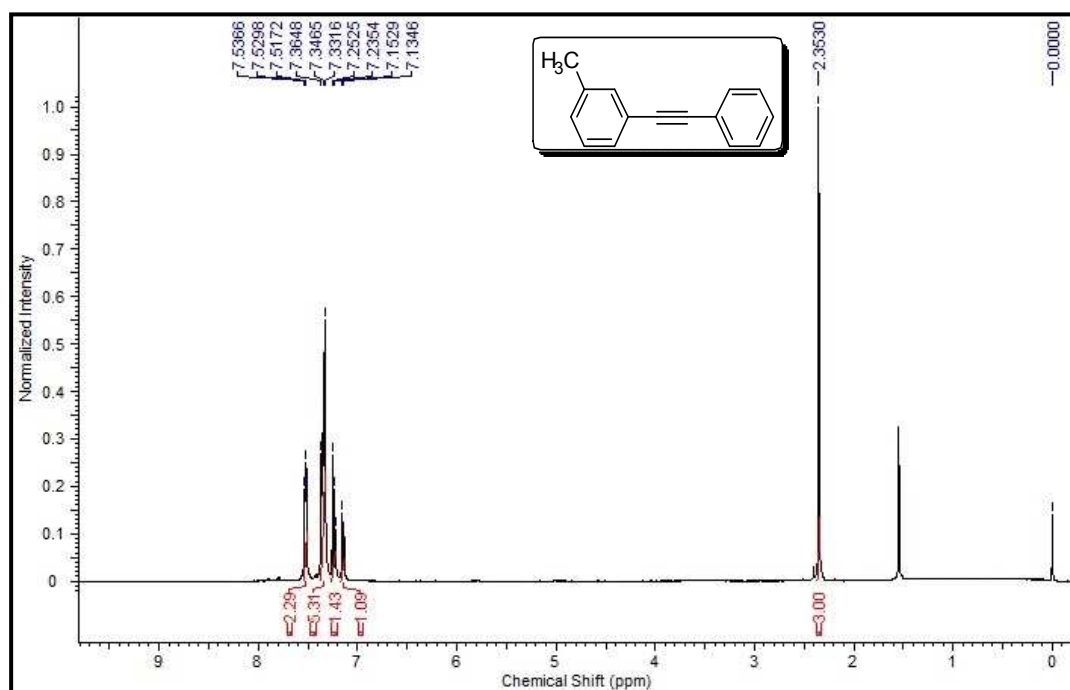

Figure S57

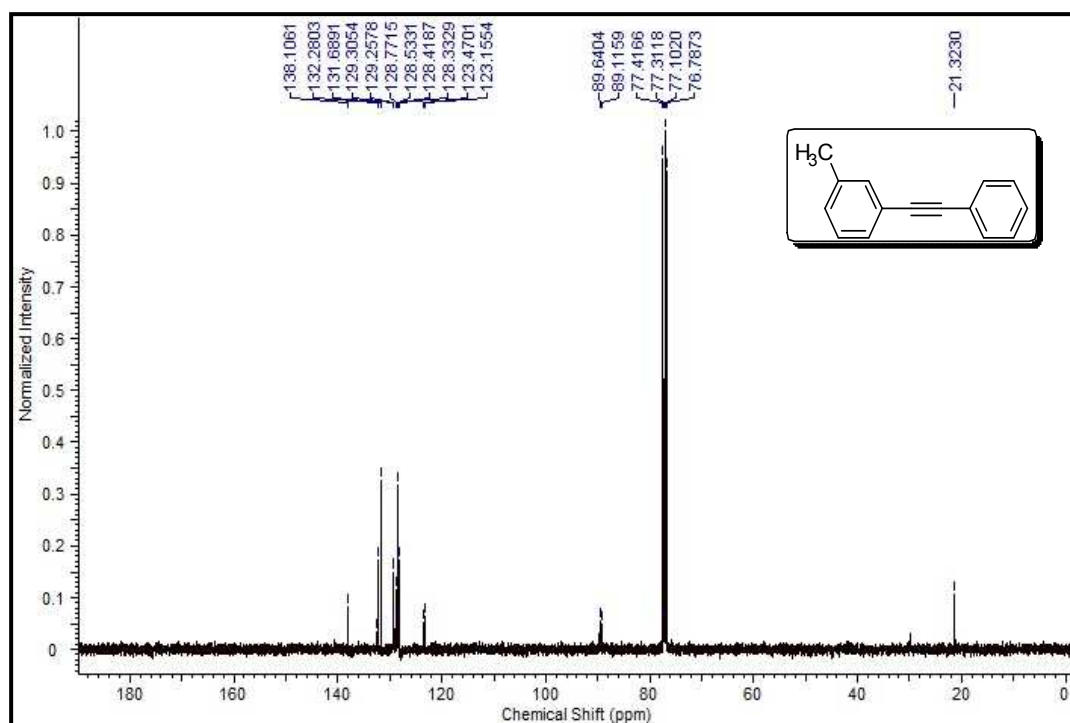

Figure S58

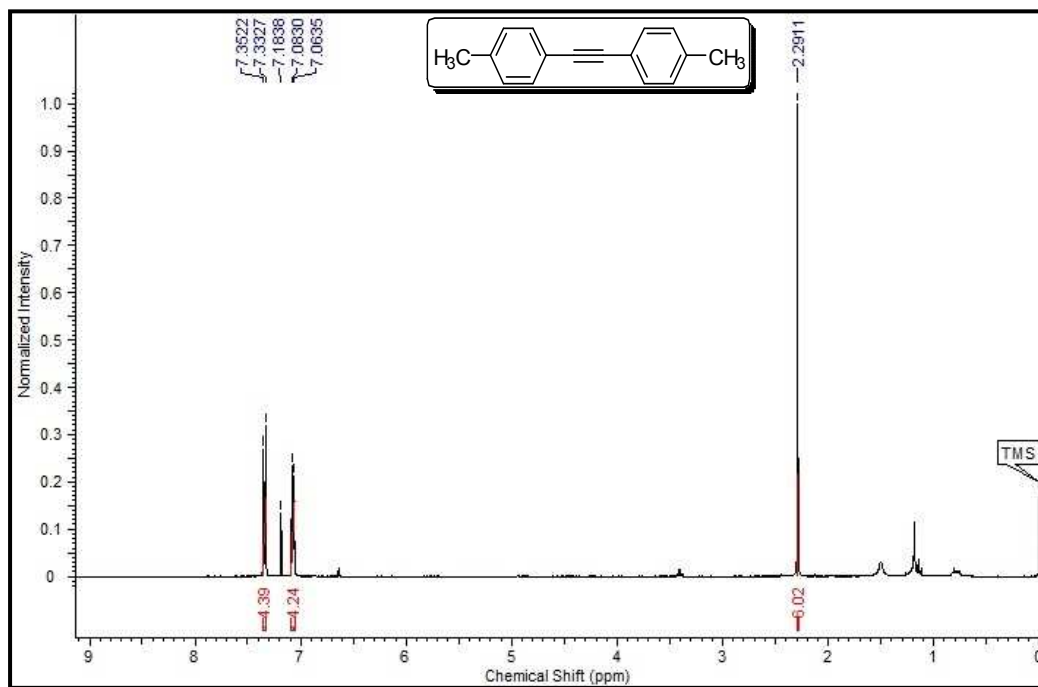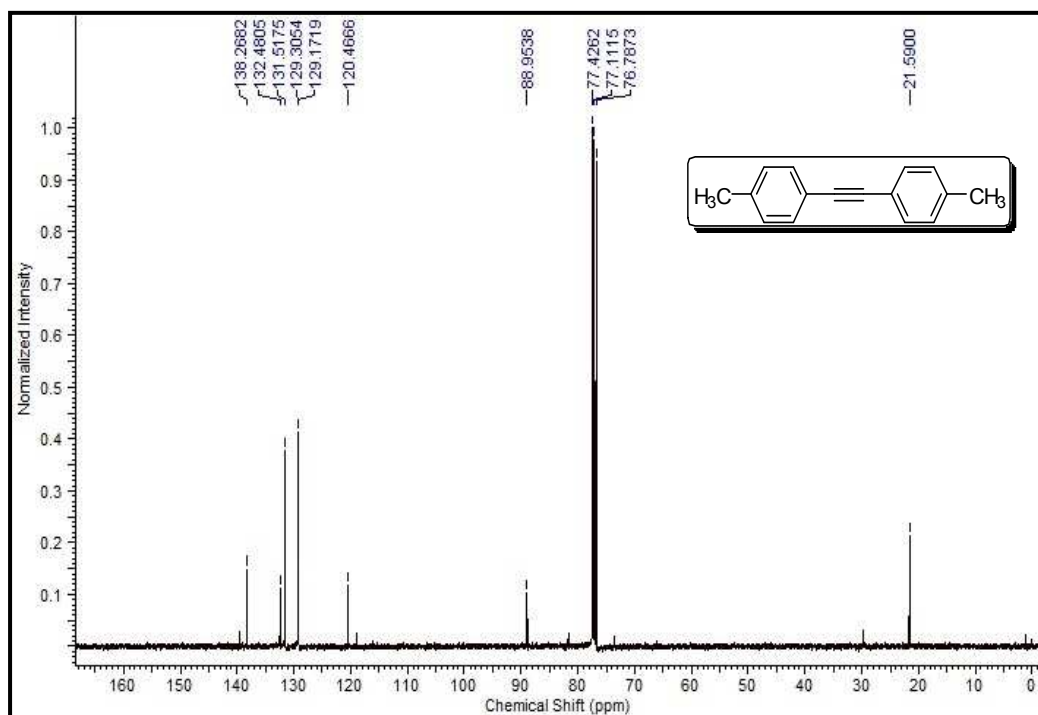

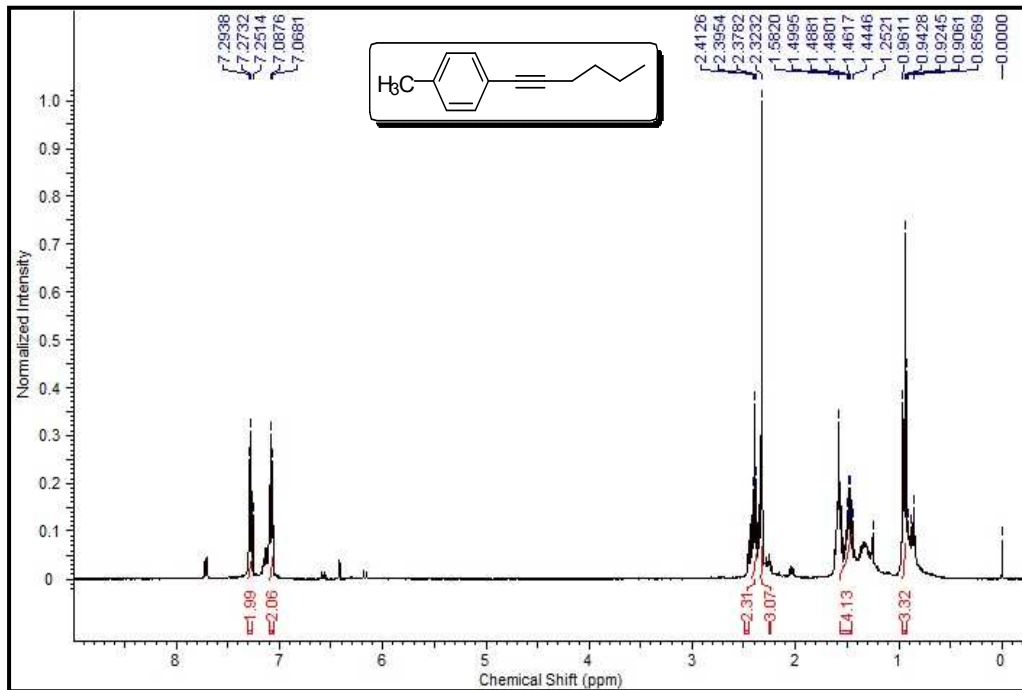

Figure S61

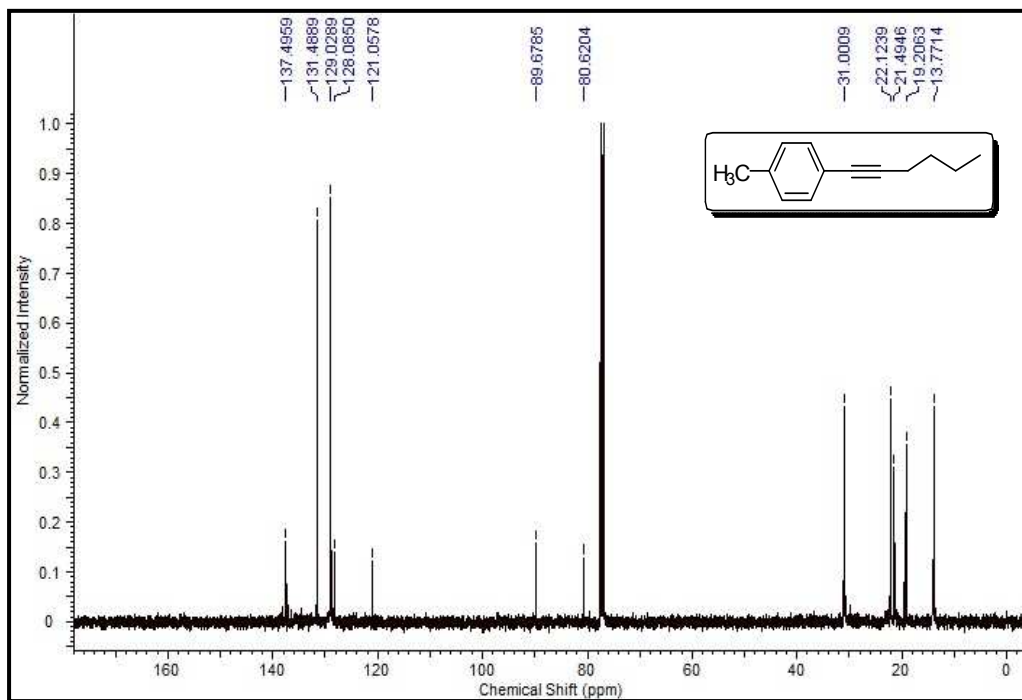

Figure S62



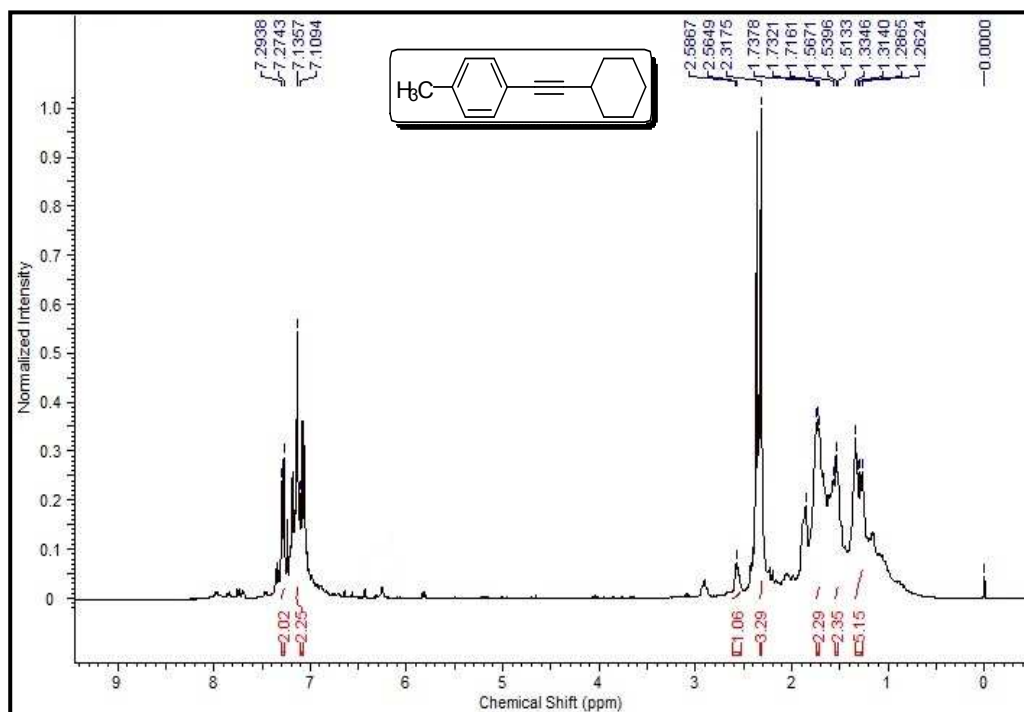

Figure S63

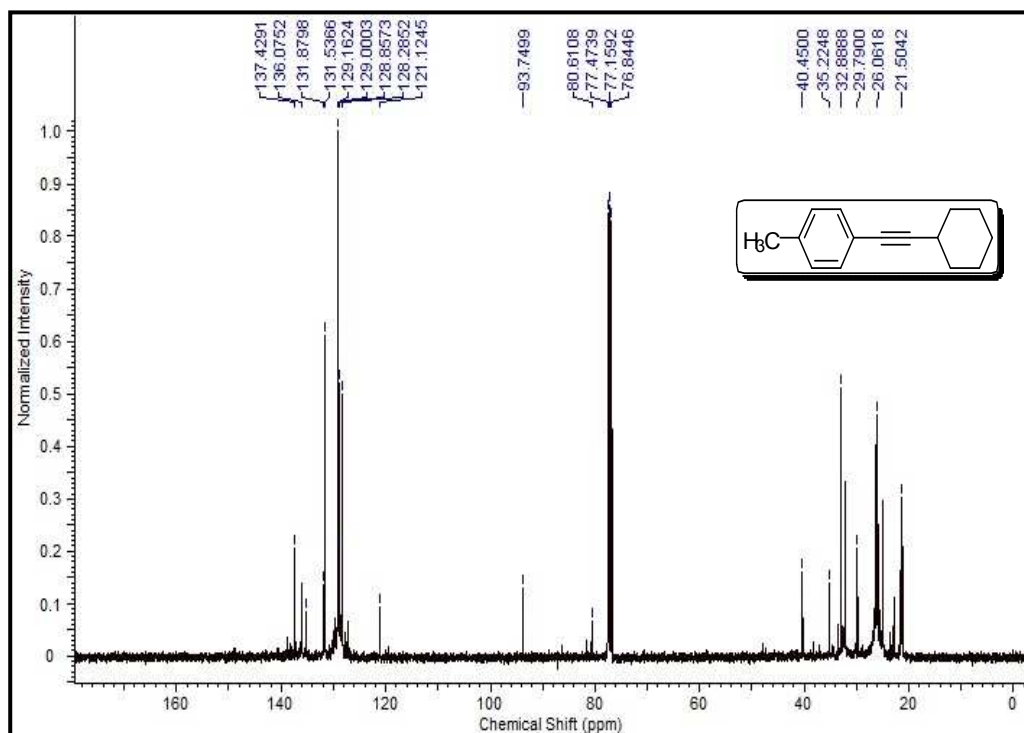

Figure S64
